# Supplementary material for: Engineering faster transglycosidases and their acceptor specificity
Source: Royal Society of Chemistry journal article supplement (doi:10.1039/c9gc00621d), 2019-01-01
Supplement: c9gc00621d1.pdf [file c9gc00621d1.pdf]

## SUPPORTING INFORMATION

### Engineering Faster Transglycosidases and their Acceptor Specificity

Linh T. Tran<sup>a,b,†,§</sup>, Vincent Blay<sup>c,d,§,\*</sup>, Sukanya Luang<sup>e</sup>, Chatchakorn Eurtivong<sup>f</sup>, Sunaree Choknud<sup>a,b</sup>, Humbert González-Díaz<sup>g,h</sup>, James R. Ketudat Cairns<sup>a,b,g,\*</sup>

<sup>a</sup>School of Chemistry, Institute of Science, Suranaree University of Technology, Nakhon Ratchasima 30000, Thailand.

<sup>b</sup>Center for Biomolecular Structure, Function and Application, Suranaree University of Technology, Nakhon Ratchasima 30000, Thailand.

<sup>c</sup>Fisher College of Business, The Ohio State University, Gerlach Hall, 2108 Neil Ave. Columbus, OH 43210, United States.

<sup>d</sup>Molecular Topology & Drug Design Research Unit, Departamento de Química Física, Universitat de València, Av. V. A. Estellés, s/n, 46100 Burjassot, Spain.

<sup>e</sup>Department of Biochemistry, Faculty of Medicine, Khon Kaen University, Khon Kaen 40002, Thailand.

<sup>f</sup>Chulabhorn Graduate Institute, Bangkok 10210, Thailand.

<sup>g</sup>Department of Organic Chemistry II, University of the Basque Country UPV/EHU, 48940, Leioa, Spain.

<sup>h</sup>IKERBASQUE, Basque Foundation for Science, 48011, Bilbao, Spain.

<sup>§</sup>Laboratory of Biochemistry, Chulabhorn Research Institute, Bangkok 10210, Thailand.

\*E-mail: blayroger.1@osu.edu (V.B.); cairns@sut.ac.th (J.K.C).

§These authors contributed equally.

†Current Address: Research Institute for Interdisciplinary Science, Okayama University, Okayama, Japan.

**Table S1.** Oligonucleotide primers used for the site-directed mutagenesis of Os9Bglu31.

| <b>Primer name</b> | <b>Sequence (5'-3')</b>                       |
|--------------------|-----------------------------------------------|
| AK121679_fwd       | CACCATGGCGGCGGGGATCACCAG                      |
| AK121679_rev       | CTCGAGAACCTTGATCACTGGGAGTAGGCTC               |
| I172T_fwd          | GCACTGTCAATGAGCCTAACACCCGAGCCGATTGGCGGATACG   |
| I172T_rev          | CGTATCCGCCAATCGGCTCGGTGT TAGGCTCATTGACAGTGC   |
| L183Q_fwd          | CGGATACGATCAAGGAATCCAACCGCCACGGCGATGCTCATTC   |
| L183Q_rev          | GGAATGAGCATCGCCGTGGCGGTTGGATTTCCTTGATCGTATCCG |
| L241D_fwd          | GGACAAATTGGGCTCACATTGGACGGTTGGTGGTACGAGCCCCG  |
| L241D_rev          | CGGGCTCGTACCACCAACCGTCCAATGTGAGCCCAATTTGTCC   |
| W243C_fwd          | GGGCTCACATTGCTCGGTTGCTGGTACGAGCCCCGGGACG      |
| W243C_rev          | CGTCCCGGGCTCGTACCAGCAACCGAGCAATGTGAGCCC       |
| W243E_fwd          | GGGCTCACATTGCTCGGTTGAAGGTACGAGCCCCGGGACG      |
| W243E_rev          | CGTCCCGGGCTCGTACCATTACCGAGCAATGTGAGCCC        |
| W243G_fwd          | GGGCTCACATTGCTCGGTGGGTGGTACGAGCCCCGGGACG      |
| W243G_rev          | CGTCCCGGGCTCGTACCACCACCGAGCAATGTGAGCCC        |
| W243H_fwd          | GGGCTCACATTGCTCGGTCATTGGTACGAGCCCCGGGACG      |
| W243H_rev          | CGTCCCGGGCTCGTACCAATGACCGAGCAATGTGAGCCC       |
| W243I_fwd          | GGGCTCACATTGCTCGGTATCTGGTACGAGCCCCGGGACG      |
| W243I_rev          | CGTCCCGGGCTCGTACCAGATACCGAGCAATGTGAGCCC       |
| W243K_fwd          | GGGCTCACATTGCTCGGTAAGTGGTACGAGCCCCGGGACG      |
| W243K_rev          | CGTCCCGGGCTCGTACCAATGACCGAGCAATGTGAGCCC       |
| W243L_fwd          | GGGCTCACATTGCTCGGTCTGTGGTACGAGCCCCGGGACG      |
| W243L_rev          | CGTCCCGGGCTCGTACCACAGACCGAGCAATGTGAGCCC       |
| W243P_fwd          | GGGCTCACATTGCTCGGTCCGTGGTACGAGCCCCGGGACG      |
| W243P_rev          | CGTCCCGGGCTCGTACCACGGACCGAGCAATGTGAGCCC       |
| W243Q_fwd          | GGGCTCACATTGCTCGGTCAGTGGTACGAGCCCCGGGACG      |
| W243Q_rev          | CGTCCCGGGCTCGTACCCTGACCGAGCAATGTGAGCCC        |
| W243R_fwd          | GGGCTCACATTGCTCGGTAGATGGTACGAGCCCCGGGACG      |
| W243R_rev          | CGTCCCGGGCTCGTACCATCTACCGAGCAATGTGAGCCC       |
| W243S_fwd          | GGGCTCACATTGCTCGGTAGCTGGTACGAGCCCCGGGACG      |
| W243S_rev          | CGTCCCGGGCTCGTACCAGCTACCGAGCAATGTGAGCCC       |
| W243T_fwd          | GGGCTCACATTGCTCGGTACCTGGTACGAGCCCCGGGACG      |
| W243T_rev          | CGTCCCGGGCTCGTACCAGGTACCGAGCAATGTGAGCCC       |
| W243V_fwd          | GGGCTCACATTGCTCGGTGTGTGGTACGAGCCCCGGGACG      |
| W243V_rev          | CGTCCCGGGCTCGTACCACACACCGAGCAATGTGAGCCC       |

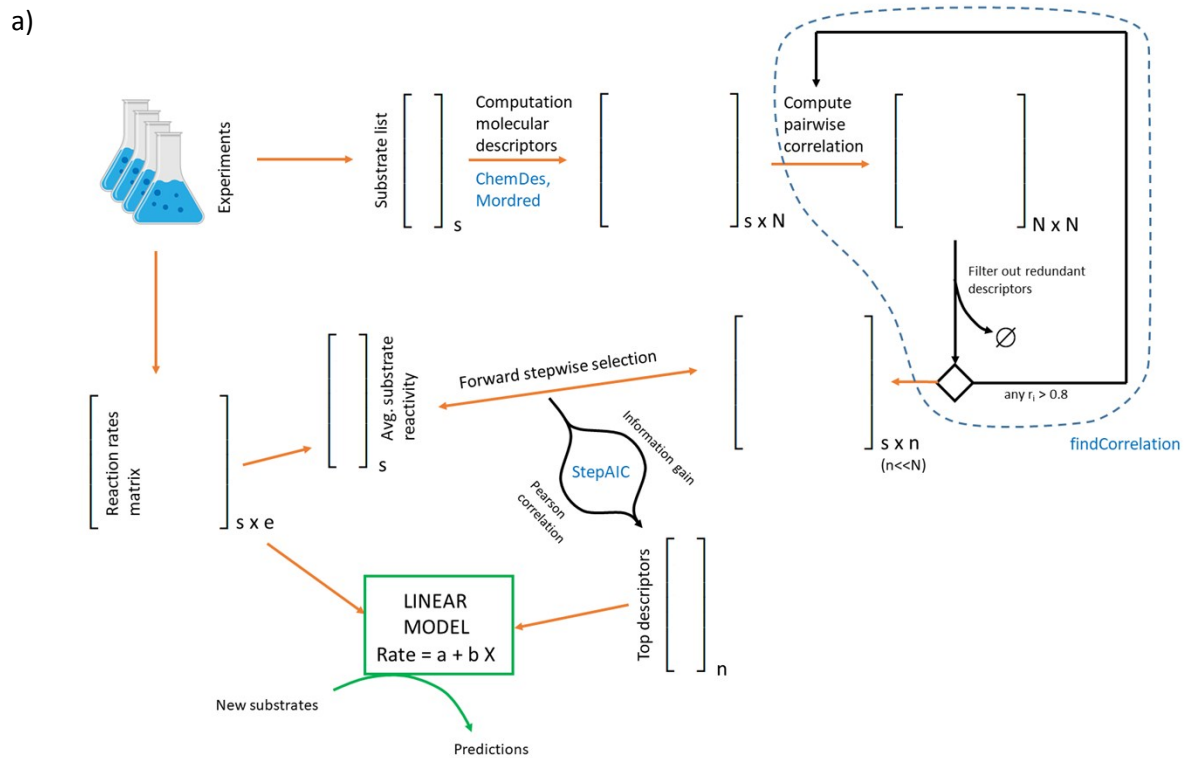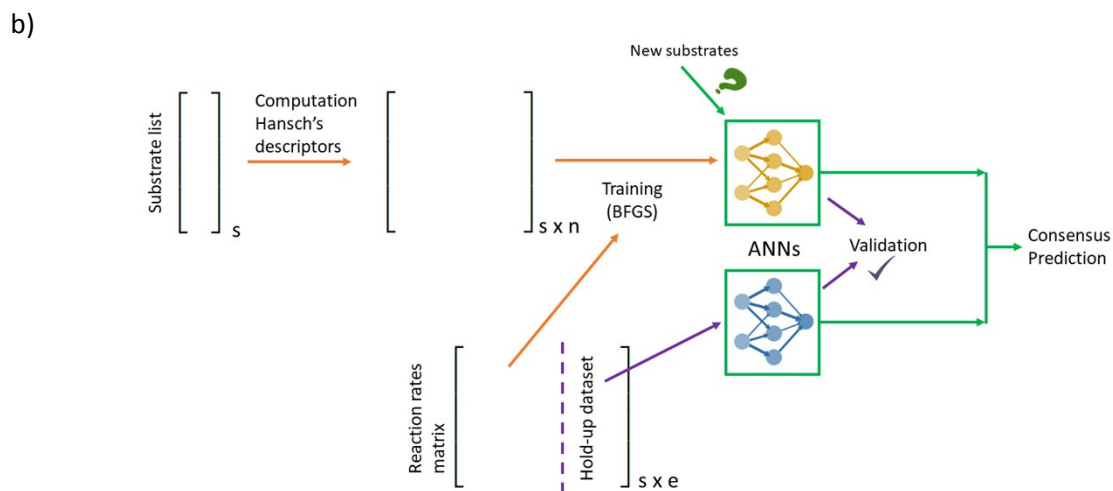

**Figure S1.** Flowchart of the data analysis used to build the a) linear and b) nonlinear ANN models in the present work.

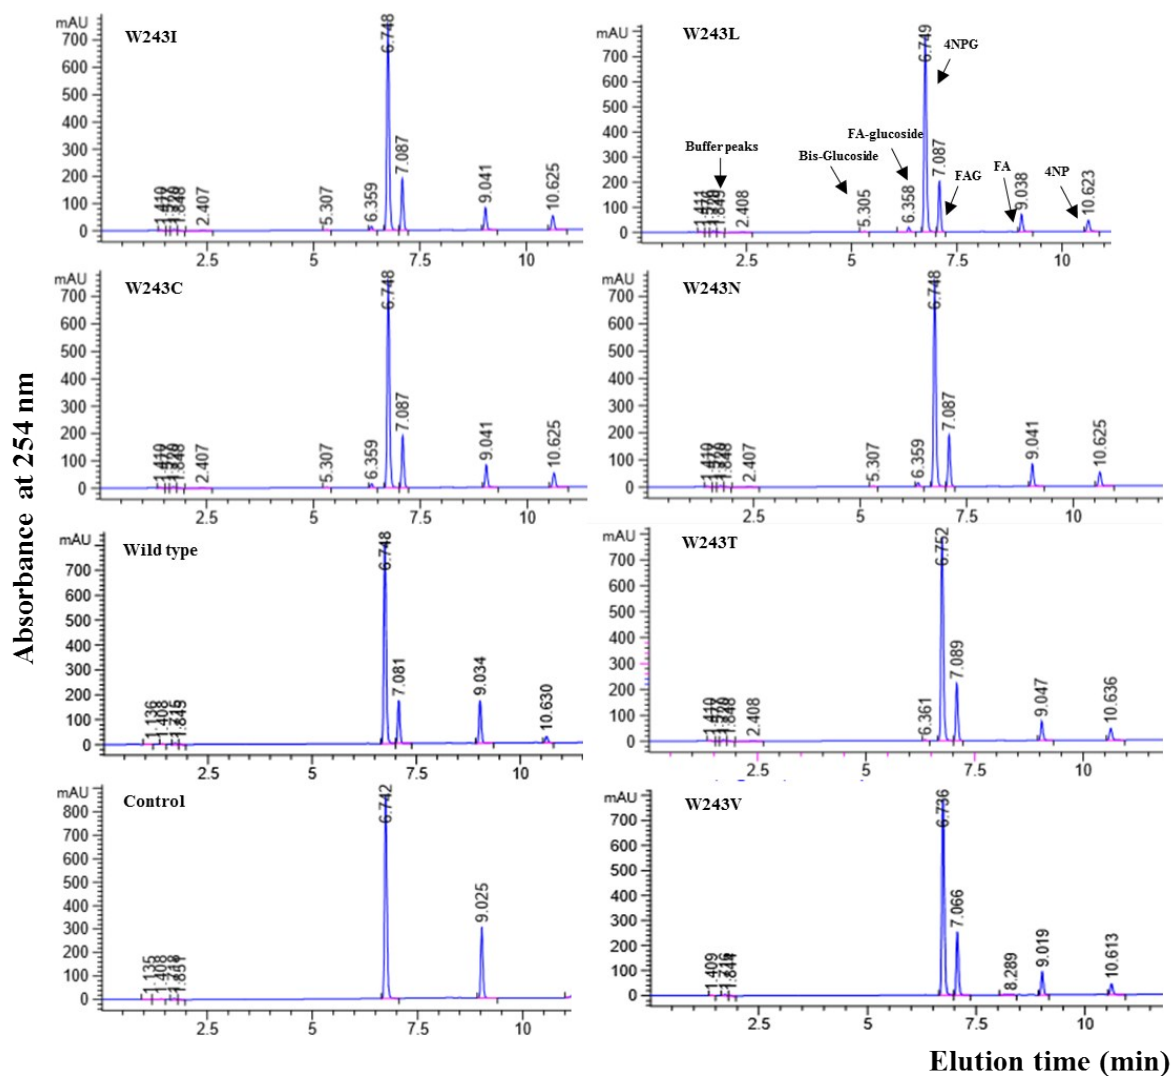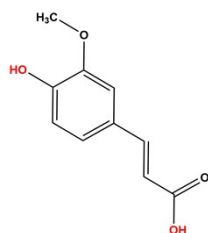

**Figure S2.** Chromatograms of reaction mixtures of Os9BGlu31 wild type and its W243 mutants in the transfer of glucose to ferulic acid. Os9BGlu31 mutants can transfer to multiple positions to provide different glucosides. The possible glycosylation positions are marked on the structure. The peaks are labeled based on the elution time of standards for ferulic acid (FA), ferulic acid glucose ester (FAG), 4-nitrophenol (4NP), and 4-nitrophenyl  $\beta$ -D-glucoside (4NPG), and the relative positions of products FA- $\beta$ -D-glucoside and FA-bis- $\beta$ -D-glucoside (Bis-glucoside), which identified by MS<sup>18</sup>.

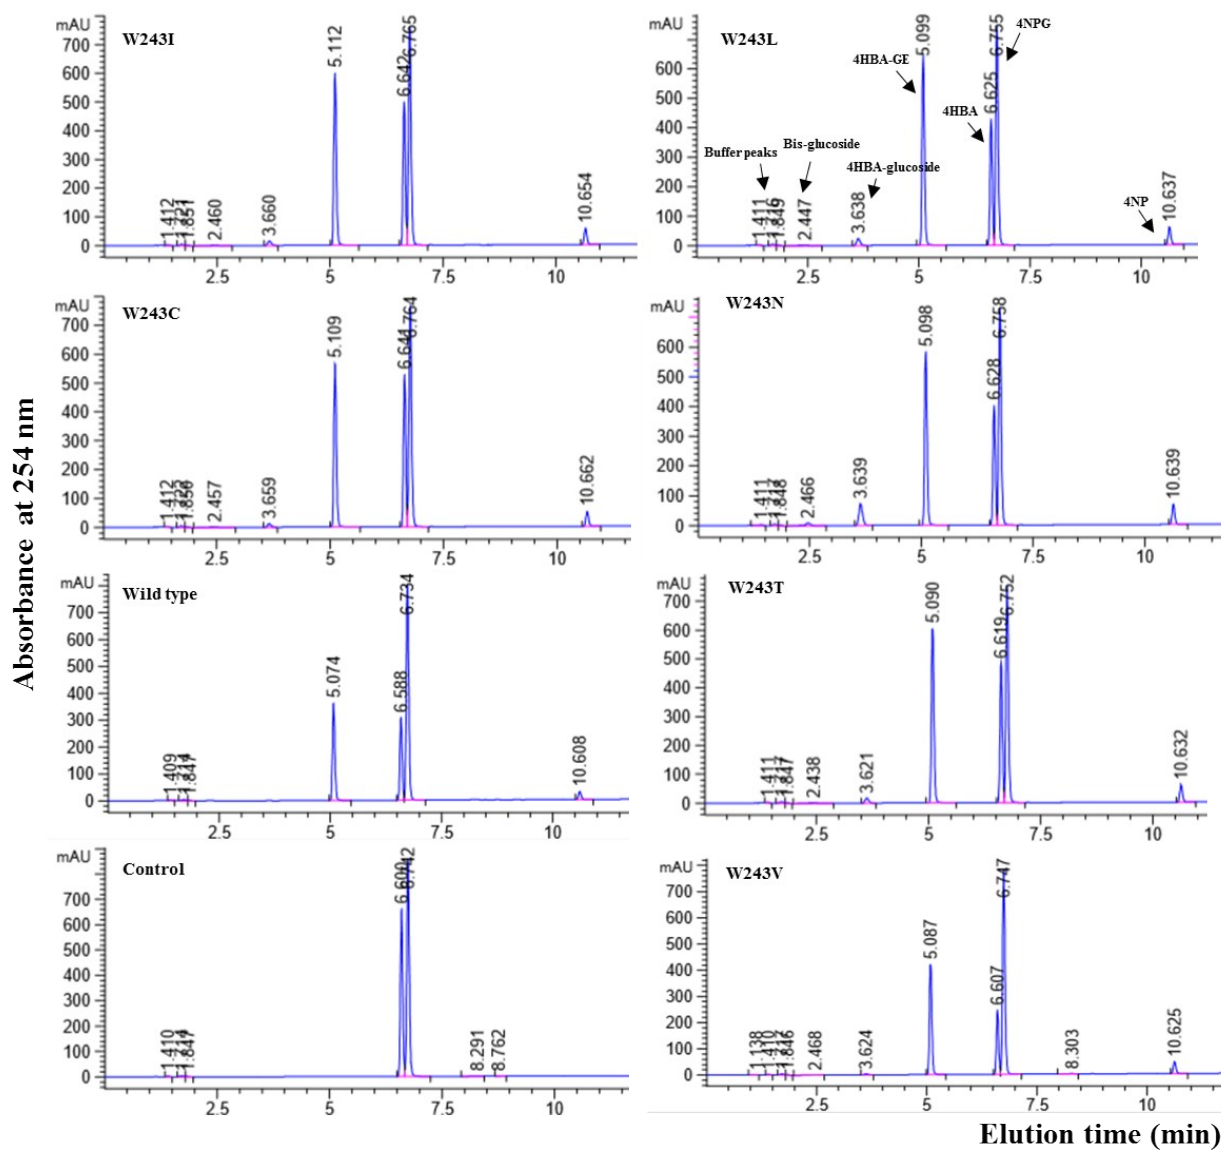

**Figure S3.** Chromatograms of reaction mixtures of Os9BGlu31 wild type and its W243 mutants in the transfer of glucose to 4-hydroxybenzoic acid (4HBA). Bis-glucoside, glucoside and glucose ester peaks eluted before the donor 4NPGlc. The peaks are labeled based on the elution time of standards for 4HBA, 4HBA-glucose ester (4HBA-GE, which was previously identified as the product made by WT Os9BGlu31<sup>14</sup>), 4-nitrophenol (4NP), and 4-nitrophenyl  $\beta$ -D-glucoside (4NPG). The relative positions of products 4HBA- $\beta$ -D-glucoside (4HBA-glucoside) and 4HBA-bis- $\beta$ -D-glucoside (Bis-glucoside) were identified by mass spectrometry<sup>18</sup>.

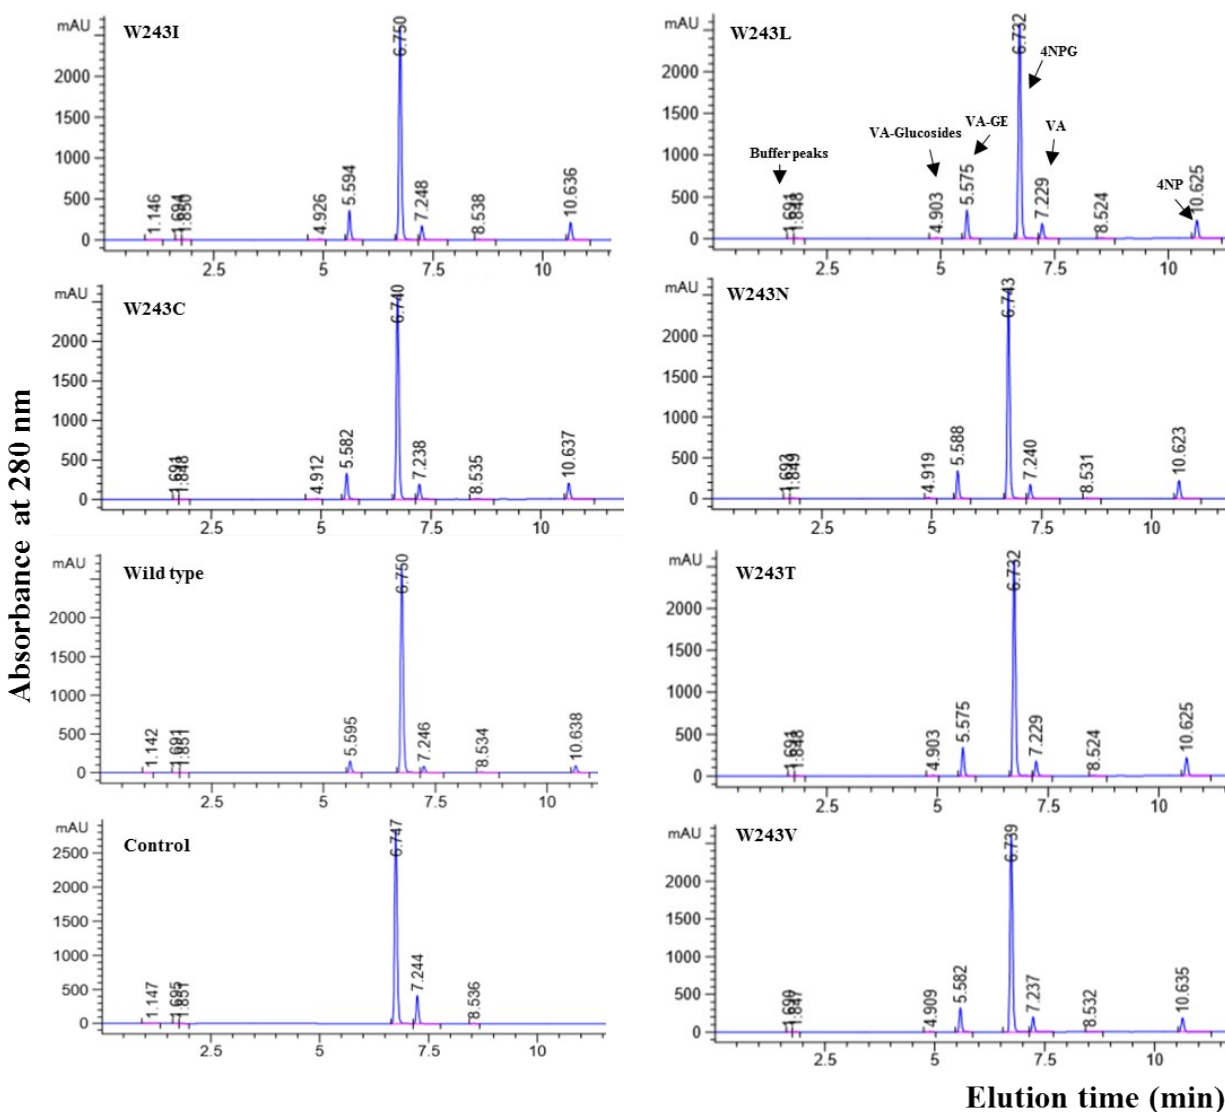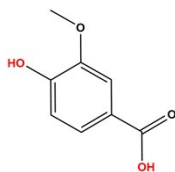

**Figure S4.** Chromatogram of reaction mixtures of wild type and W243 mutants. Os9BGlu31 mutants in the transfer glucose to both the hydroxyl group and carboxyl groups in vanillic acid (VA) to produce glucoconjugates. The peaks are labeled based on the elution time of standards for VA, 4HBA-glucose ester (4HBA-GE, which was previously identified as the product made by wild type Os9BGlu31<sup>14,18</sup>), 4-nitrophenol (4NP), and 4-nitrophenyl  $\beta$ -D-glucoside (4NPG). The relative positions of the VA- $\beta$ -D-glucoside (4HBA-glucoside) was identified by mass spectrometry<sup>18</sup>. Unlike the other phenolic acids, no bis-glucoside was detected for VA.

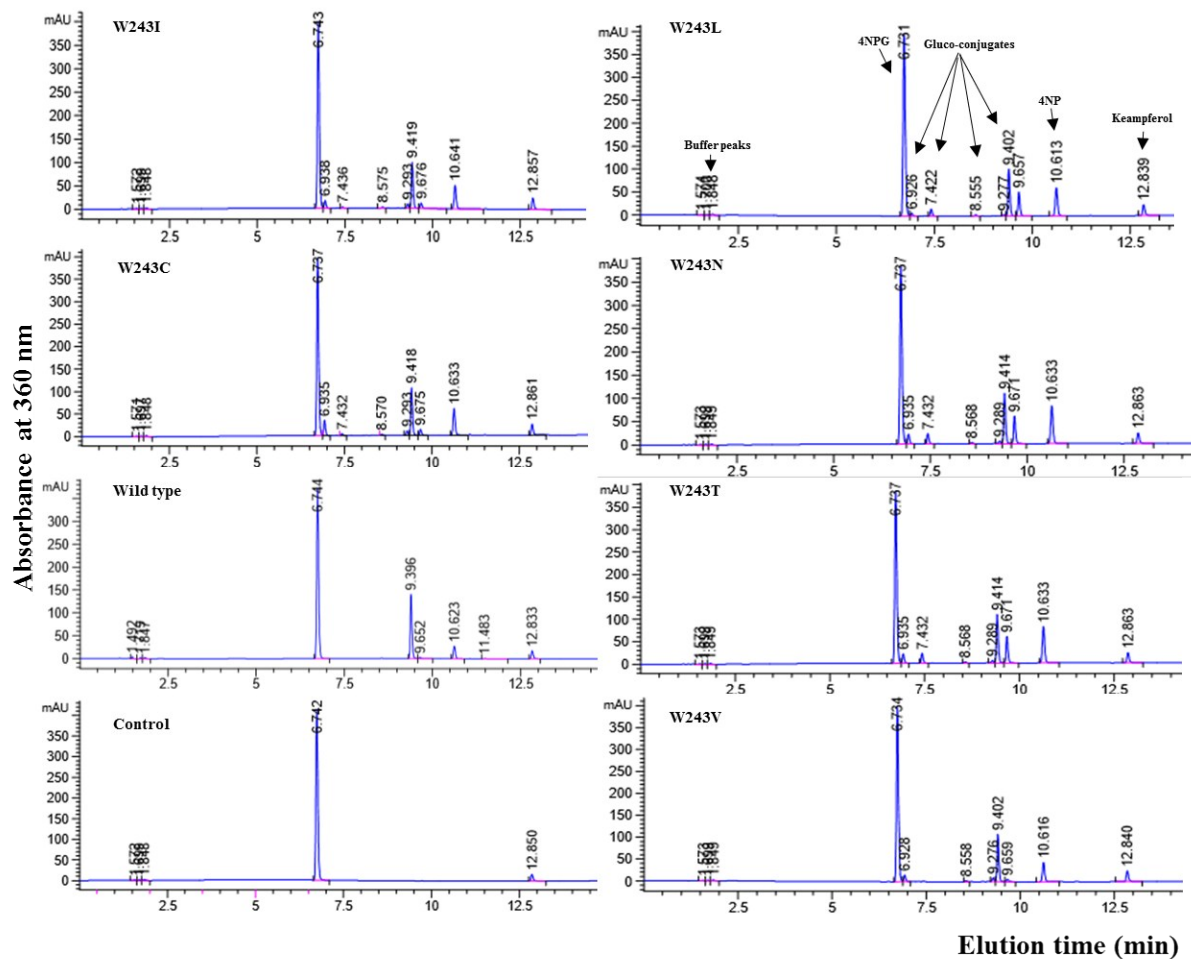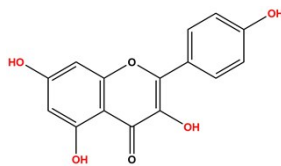

**Figure S5.** Chromatograms of reaction mixtures of Os9BGluc31 wild type and its mutants in the transfer of glucose to kaempferol. Os9BGluc31 mutants can transfer to multiple positions to provide different glucosides. The peaks are labeled based on the elution time of standards for kaempferol, 4-nitrophenol (4NP), and 4-nitrophenyl  $\beta$ -D-glucoside (4NPG). According to MS results, the later eluting glucosyl conjugates are mono-glucosides, while the earlier eluting kaempferol glucoconjugates are bis-glucosides<sup>18</sup>.

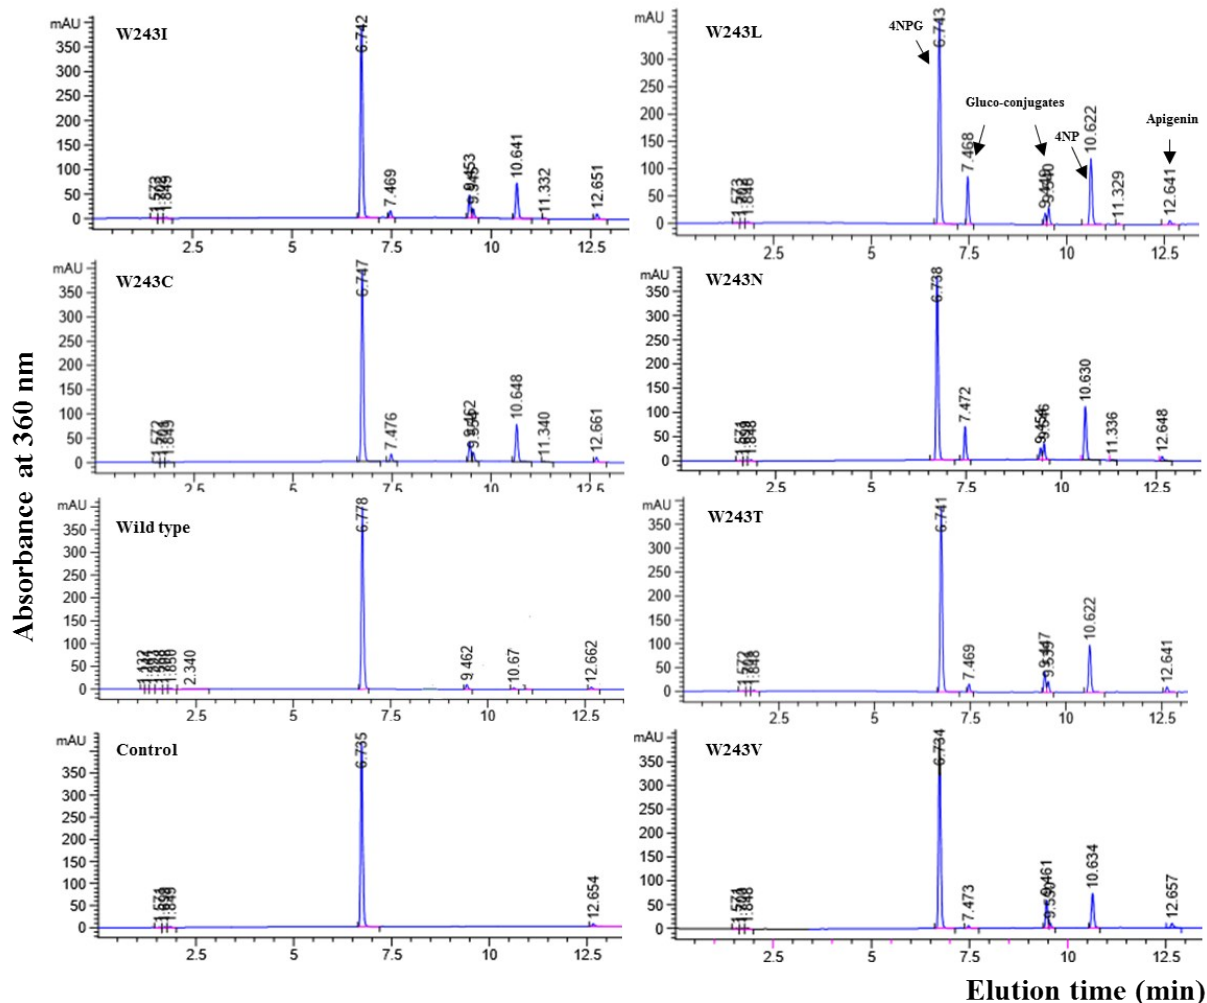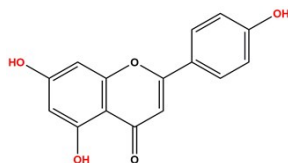

**Figure S6.** Chromatograms of reaction mixtures of Os9BGlu31 wild type and its W243 mutants in the transfer of glucose to apigenin. The peaks are labeled based on the elution time of standards for apigenin, 4-nitrophenol (4NP), and 4-nitrophenyl  $\beta$ -D-glucoside (4NPG). By comparison with the position of kaempferol glucoside identified by MS<sup>18</sup>, the closely spaced peaks at 9 min were assigned to apigenin monoglucosides, while the peak at 7.47 min is corresponds to a bis-glucoside.



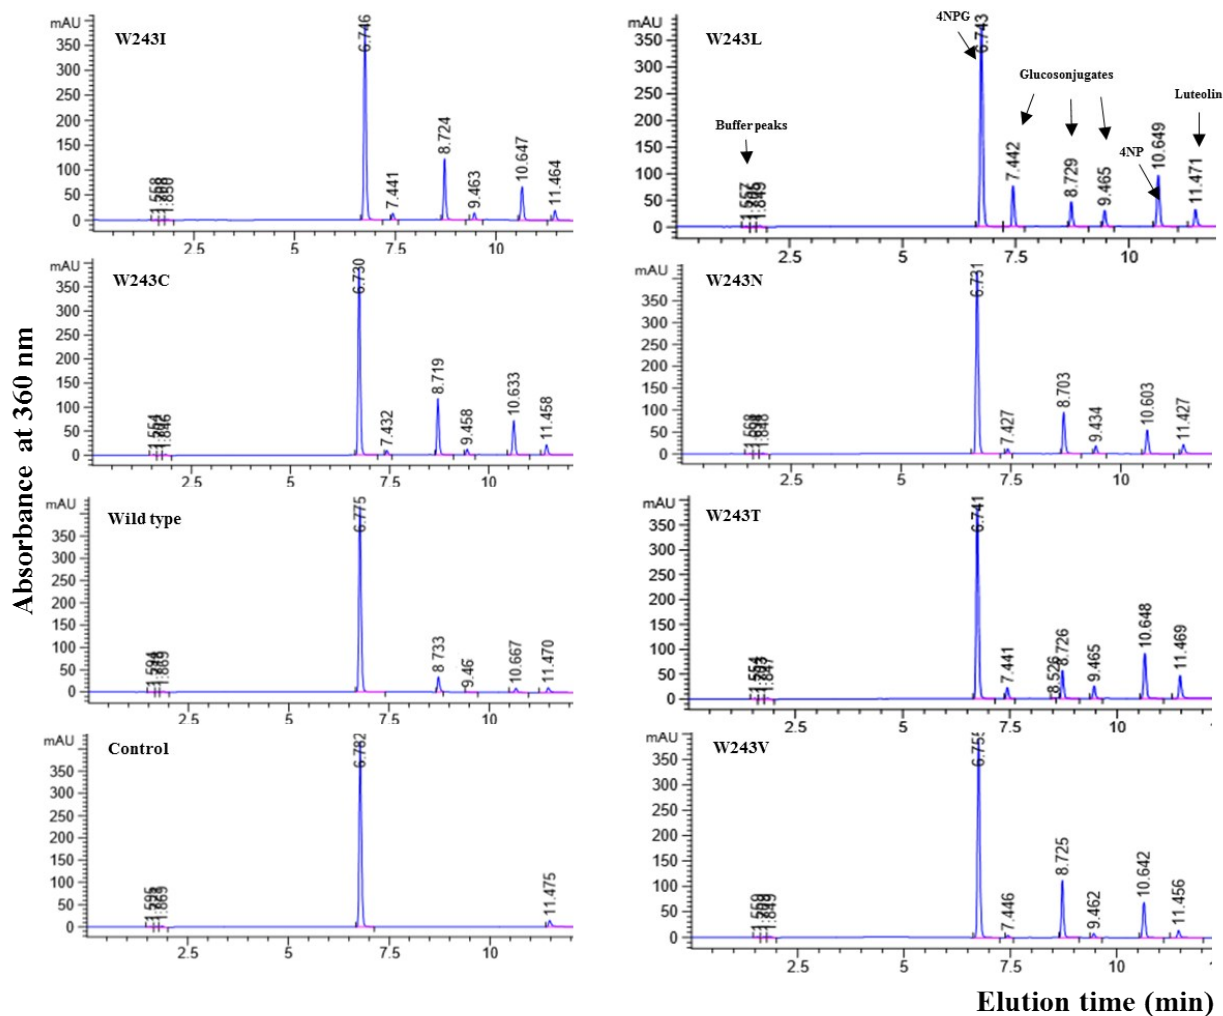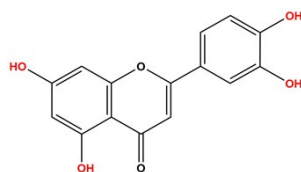

**Figure S7.** Chromatograms of reaction mixtures of Os9BGlu31 wild type and its W243 mutants in the transfer of glucose to luteolin. The peaks are labeled in the W243L reaction chromatogram based on the elution time of standards for luteolin, 4-nitrophenol (4NP), and 4-nitrophenyl  $\beta$ -D-glucoside (4NPG). By comparison with the position of kaempferol glucoside identified by MS<sup>18</sup>, the peaks at 8.7 and 9.4 min were assigned to luteolin monoglucosides, while the peak at 7.4 min corresponds to a bis-glucoside.

**Table S2.** Top scores (GoldScore) calculated when docking the acceptor substrates on the wild-type Os9BGlu31 and its W243L mutant.

| <b>Acceptor substrate</b>   | <b>Wild type</b> | <b>W243L</b> |
|-----------------------------|------------------|--------------|
| 4-coumaric acid             | 39.72            | 43.16        |
| Ferulic acid                | 43.92            | 48.68        |
| Caffeic acid                | 44.71            | 47.16        |
| <i>Trans</i> -cinnamic acid | 39.34            | 48.58        |
| 4-Hydroxybenzoic acid       | 36.58            | 37.35        |
| Vanillic acid               | 41.43            | 41.25        |
| Syringic acid               | 40.74            | 46.34        |
| Sinapic acid                | 46.03            | 41.77        |
| Salicylic acid              | 34.71            | 35.19        |
| 1-Naphthaleneacetic acid    | 43.65            | 46.78        |
| 1-Naphthol                  | 39.15            | 41.67        |
| 6-Hydroxyflavone            | 41.61            | 52.99        |
| Chrysin                     | 43.74            | 49.02        |
| Apigenin                    | 44.53            | 54.76        |
| Hesperitin                  | 47.06            | 51.10        |
| Kaempferol                  | 47.60            | 49.12        |
| Luteoline                   | 45.20            | 51.42        |
| Water                       | 10.28            | 10.29        |

**Table S3.** Nomenclature of the molecular descriptors identified by the method in this work.

| Variable          | Name                                                                           |
|-------------------|--------------------------------------------------------------------------------|
| AATS7dv           | Averaged Moreau-Broto autocorrelation of lag 7 weighted by valence electrons   |
| ALOGP             | Ghose-Crippen logK <sub>ow</sub>                                               |
| ATSC2pe           | Centered moreau-broto autocorrelation of lag 2 weighted by pauling EN          |
| ATSC5c            | Centered moreau-broto autocorrelation of lag 5 weighted by gasteiger charge    |
| ATSC5dv           | Centered moreau-broto autocorrelation of lag 5 weighted by valence electrons   |
| ATSC8c            | Centered moreau-broto autocorrelation of lag 8 weighted by gasteiger charge    |
| BCUTd.11          | First lowest eigenvalue of Burden matrix weighted by sigma electrons           |
| EstateVSA0        | Estate VSA Descriptor 0                                                        |
| GATS1Z            | Geary coefficient of lag 1 weighted by atomic number                           |
| GATSp6            | Geary coefficient of lag 1 weighted by atomic number                           |
| JGI10             | 10-ordered mean topological charge                                             |
| JGI7              | 6-ordered mean topological charge                                              |
| largestChain      | The number of atoms in the largest chain.                                      |
| MATS3dv           | Moran coefficient of lag 3 weighted by valence electrons                       |
| MATSe6            | Moran autocorrelation of lag6 weighted by atomic Sanderson electronegativities |
| MATsv5            | Moran autocorrelation of lag5 weighted by atomic van der Waals volumes         |
| MinAbsEStateIndex | Returns a tuple of estate indices for the molecule                             |
| Mor06m            | 3D-morse weighted by mass (distance = 6)                                       |
| Mor13             | 3D-morse (distance = 13)                                                       |
| Mor29             | 3D-morse (distance = 29)                                                       |
| Mor31se           | 3D-morse weighted by Sanderson electronegativities (distance = 31)             |
| MR                | Molar refractivity                                                             |
| RPCS              | Relative positive charge surface area                                          |
| TPSA              | Topological polar surface area based on fragments                              |

**Table S4.** Correlation matrix between selected molecular descriptors. Absolute values are presented for convenience. All colors belong to a single-color scale considering absolute values.

|                                  | TPSA | MR   | logP | Mor31se | JGI10 | AATS7dv | MinAbsEStateIndex | JGI7 | BCUTd.1l | EstateVSA0 | MATSe6 | MATSV5 | RPCS | GATS1Z | Mor06m | ATSC2pe | ATSC8c | GATSp6 | Mor13 | Mor29 | ATSC5c | ATSC5dv | MATSV3dv | largestChain |
|----------------------------------|------|------|------|---------|-------|---------|-------------------|------|----------|------------|--------|--------|------|--------|--------|---------|--------|--------|-------|-------|--------|---------|----------|--------------|
| largestChain                     | 0.27 | 0.51 | 0.57 | 0.39    | 0.45  | 0.08    | 0.37              | 0.60 | 0.60     | 0.15       | 0.50   | 0.39   | 0.37 | 0.68   | 0.57   | 0.47    | 0.58   | 0.70   | 0.55  | 0.53  | 0.52   | 0.51    | 0.72     | 1            |
| MATSV3dv                         | 0.27 | 0.49 | 0.47 | 0.26    | 0.32  | 0.02    | 0.22              | 0.42 | 0.38     | 0.03       | 0.12   | 0.33   | 0.31 | 0.62   | 0.70   | 0.53    | 0.56   | 0.52   | 0.37  | 0.61  | 0.42   | 0.75    | 1        |              |
| ATSC5dv                          | 0.58 | 0.70 | 0.43 | 0.27    | 0.30  | 0.36    | 0.39              | 0.10 | 0.27     | 0.21       | 0.10   | 0.13   | 0.42 | 0.47   | 0.71   | 0.68    | 0.52   | 0.40   | 0.59  | 0.67  | 0.75   | 1       |          |              |
| ATSC5c                           | 0.54 | 0.58 | 0.40 | 0.35    | 0.19  | 0.37    | 0.26              | 0.07 | 0.24     | 0.19       | 0.29   | 0.14   | 0.24 | 0.37   | 0.35   | 0.34    | 0.58   | 0.35   | 0.57  | 0.49  | 1      |         |          |              |
| Mor29                            | 0.70 | 0.35 | 0.07 | 0.13    | 0.17  | 0.13    | 0.32              | 0.48 | 0.12     | 0.41       | 0.43   | 0.15   | 0.49 | 0.19   | 0.37   | 0.62    | 0.46   | 0.61   | 0.61  | 1     |        |         |          |              |
| Mor13                            | 0.80 | 0.72 | 0.34 | 0.10    | 0.35  | 0.58    | 0.47              | 0.01 | 0.31     | 0.41       | 0.06   | 0.34   | 0.75 | 0.28   | 0.51   | 0.58    | 0.50   | 0.25   | 1     |       |        |         |          |              |
| GATSp6                           | 0.16 | 0.04 | 0.04 | 0.02    | 0.23  | 0.25    | 0.33              | 0.76 | 0.47     | 0.17       | 0.70   | 0.02   | 0.20 | 0.23   | 0.26   | 0.36    | 0.26   | 1      |       |       |        |         |          |              |
| ATSC8c                           | 0.36 | 0.53 | 0.48 | 0.53    | 0.48  | 0.15    | 0.02              | 0.30 | 0.35     | 0.30       | 0.22   | 0.13   | 0.53 | 0.40   | 0.60   | 0.34    | 1      |        |       |       |        |         |          |              |
| ATSC2pe                          | 0.57 | 0.66 | 0.35 | 0.28    | 0.49  | 0.25    | 0.41              | 0.23 | 0.34     | 0.04       | 0.10   | 0.67   | 0.62 | 0.41   | 0.71   | 1       |        |        |       |       |        |         |          |              |
| Mor06m                           | 0.28 | 0.69 | 0.65 | 0.46    | 0.56  | 0.15    | 0.34              | 0.15 | 0.51     | 0.17       | 0.00   | 0.46   | 0.52 | 0.53   | 1      |         |        |        |       |       |        |         |          |              |
| GATS1Z                           | 0.27 | 0.72 | 0.74 | 0.71    | 0.68  | 0.17    | 0.36              | 0.11 | 0.13     | 0.24       | 0.19   | 0.53   | 0.35 | 1      |        |         |        |        |       |       |        |         |          |              |
| RPCS                             | 0.72 | 0.68 | 0.31 | 0.30    | 0.66  | 0.57    | 0.32              | 0.04 | 0.14     | 0.32       | 0.04   | 0.44   | 1    |        |        |         |        |        |       |       |        |         |          |              |
| MATSV5                           | 0.26 | 0.51 | 0.40 | 0.32    | 0.49  | 0.10    | 0.24              | 0.12 | 0.20     | 0.14       | 0.13   | 1      |      |        |        |         |        |        |       |       |        |         |          |              |
| MATSe6                           | 0.12 | 0.10 | 0.13 | 0.01    | 0.08  | 0.39    | 0.31              | 0.69 | 0.08     | 0.00       | 1      |        |      |        |        |         |        |        |       |       |        |         |          |              |
| EstateVSA0                       | 0.54 | 0.09 | 0.32 | 0.33    | 0.06  | 0.24    | 0.12              | 0.15 | 0.36     | 1          |        |        |      |        |        |         |        |        |       |       |        |         |          |              |
| BCUTd.1l                         | 0.21 | 0.25 | 0.57 | 0.30    | 0.21  | 0.08    | 0.09              | 0.32 | 1        |            |        |        |      |        |        |         |        |        |       |       |        |         |          |              |
| JGI7                             | 0.07 | 0.23 | 0.15 | 0.11    | 0.01  | 0.66    | 0.22              | 1    |          |            |        |        |      |        |        |         |        |        |       |       |        |         |          |              |
| MinAbsEStateIndex                | 0.53 | 0.37 | 0.06 | 0.06    | 0.26  | 0.13    | 1                 |      |          |            |        |        |      |        |        |         |        |        |       |       |        |         |          |              |
| AATS7dv                          | 0.65 | 0.68 | 0.33 | 0.21    | 0.36  | 1       |                   |      |          |            |        |        |      |        |        |         |        |        |       |       |        |         |          |              |
| JGI10                            | 0.33 | 0.68 | 0.63 | 0.75    | 1     |         |                   |      |          |            |        |        |      |        |        |         |        |        |       |       |        |         |          |              |
| Mor31se                          | 0.00 | 0.64 | 0.83 | 1       |       |         |                   |      |          |            |        |        |      |        |        |         |        |        |       |       |        |         |          |              |
| logP                             | 0.03 | 0.77 | 1    |         |       |         |                   |      |          |            |        |        |      |        |        |         |        |        |       |       |        |         |          |              |
| MR                               | 0.64 | 1    |      |         |       |         |                   |      |          |            |        |        |      |        |        |         |        |        |       |       |        |         |          |              |
| TPSA                             | 1    |      |      |         |       |         |                   |      |          |            |        |        |      |        |        |         |        |        |       |       |        |         |          |              |
| Correlation to other descriptors | 0.39 | 0.51 | 0.39 | 0.32    | 0.38  | 0.30    | 0.27              | 0.26 | 0.28     | 0.22       | 0.21   | 0.29   | 0.41 | 0.41   | 0.45   | 0.44    | 0.40   | 0.32   | 0.44  | 0.40  | 0.37   | 0.45    | 0.41     | 0.48         |
| Correlation to Rate              | 0.37 | 0.46 | 0.36 | 0.32    | 0.39  | 0.11    | 0.23              | 0.28 | 0.36     | 0.05       | 0.26   | 0.21   | 0.42 | 0.42   | 0.45   | 0.46    | 0.46   | 0.46   | 0.47  | 0.48  | 0.48   | 0.49    | 0.49     | 0.61         |

**Table S5.** Predicted transglycosylation rates (in nmol 4NP min<sup>-1</sup> mg<sup>-1</sup>) to several putative acceptors by wild-type Os9BGlu31 enzyme and different variants by the ensemble of the 10 neural networks in Table 3 (2.5 vol.% DMSO).

| Compound                  | MR      | logP   | TPSA   | L183QW243N | L241DW243N | W243C | W243I | W243L | W243N | W243T | W243V | WT  |
|---------------------------|---------|--------|--------|------------|------------|-------|-------|-------|-------|-------|-------|-----|
| 3,4-Dihydroxybenzoic acid | 37.447  | 0.796  | 77.76  | 151        | 713        | 280   | 424   | 814   | 813   | 510   | 389   | 139 |
| 3-Indoleacetate           | 47.901  | -0.022 | 55.92  | 640        | 1298       | 833   | 1061  | 1506  | 1508  | 1191  | 1022  | 639 |
| 6-Benzylaminopurine       | 65.476  | 1.483  | 66.49  | 444        | 1065       | 604   | 785   | 1195  | 1226  | 916   | 758   | 428 |
| Ampicillin                | 92.564  | 0.318  | 112.73 | 915        | 1556       | 1073  | 1328  | 1792  | 1872  | 1546  | 1319  | 923 |
| Arbutin                   | 62.61   | -1.429 | 119.61 | 864        | 1538       | 1058  | 1324  | 1798  | 1821  | 1487  | 1288  | 881 |
| <i>cis</i> -Jasmone       | 52.129  | 3.022  | 17.07  | 222        | 788        | 350   | 482   | 876   | 897   | 584   | 452   | 200 |
| Cyanidin-3-glucoside      | 108.294 | 0.382  | 191.6  | 365        | 582        | 425   | 532   | 685   | 750   | 614   | 537   | 368 |
| Digitoxin                 | 194.937 | 3.247  | 182.83 | 756        | 0          | 349   | 210   | 0     | 0     | 374   | 491   | 818 |
| Dopamine                  | 42.968  | 0.599  | 66.48  | 316        | 951        | 483   | 666   | 1086  | 1086  | 770   | 627   | 307 |
| Hydroquinone              | 30.488  | 1.098  | 40.46  | 183        | 764        | 323   | 479   | 884   | 870   | 567   | 440   | 170 |
| Indole-3-acetic acid      | 49.843  | 1.313  | 53.09  | 342        | 984        | 509   | 689   | 1113  | 1122  | 800   | 651   | 330 |
| Serotonin                 | 52.802  | 0.893  | 62.04  | 429        | 1090       | 610   | 806   | 1238  | 1249  | 925   | 768   | 420 |
| Tetracycline              | 110.218 | -0.214 | 181.62 | 720        | 1097       | 835   | 1028  | 1316  | 1381  | 1164  | 1023  | 744 |
| <i>trans</i> -Zeatin      | 60.905  | 0.173  | 86.72  | 586        | 1257       | 777   | 996   | 1435  | 1455  | 1133  | 960   | 582 |

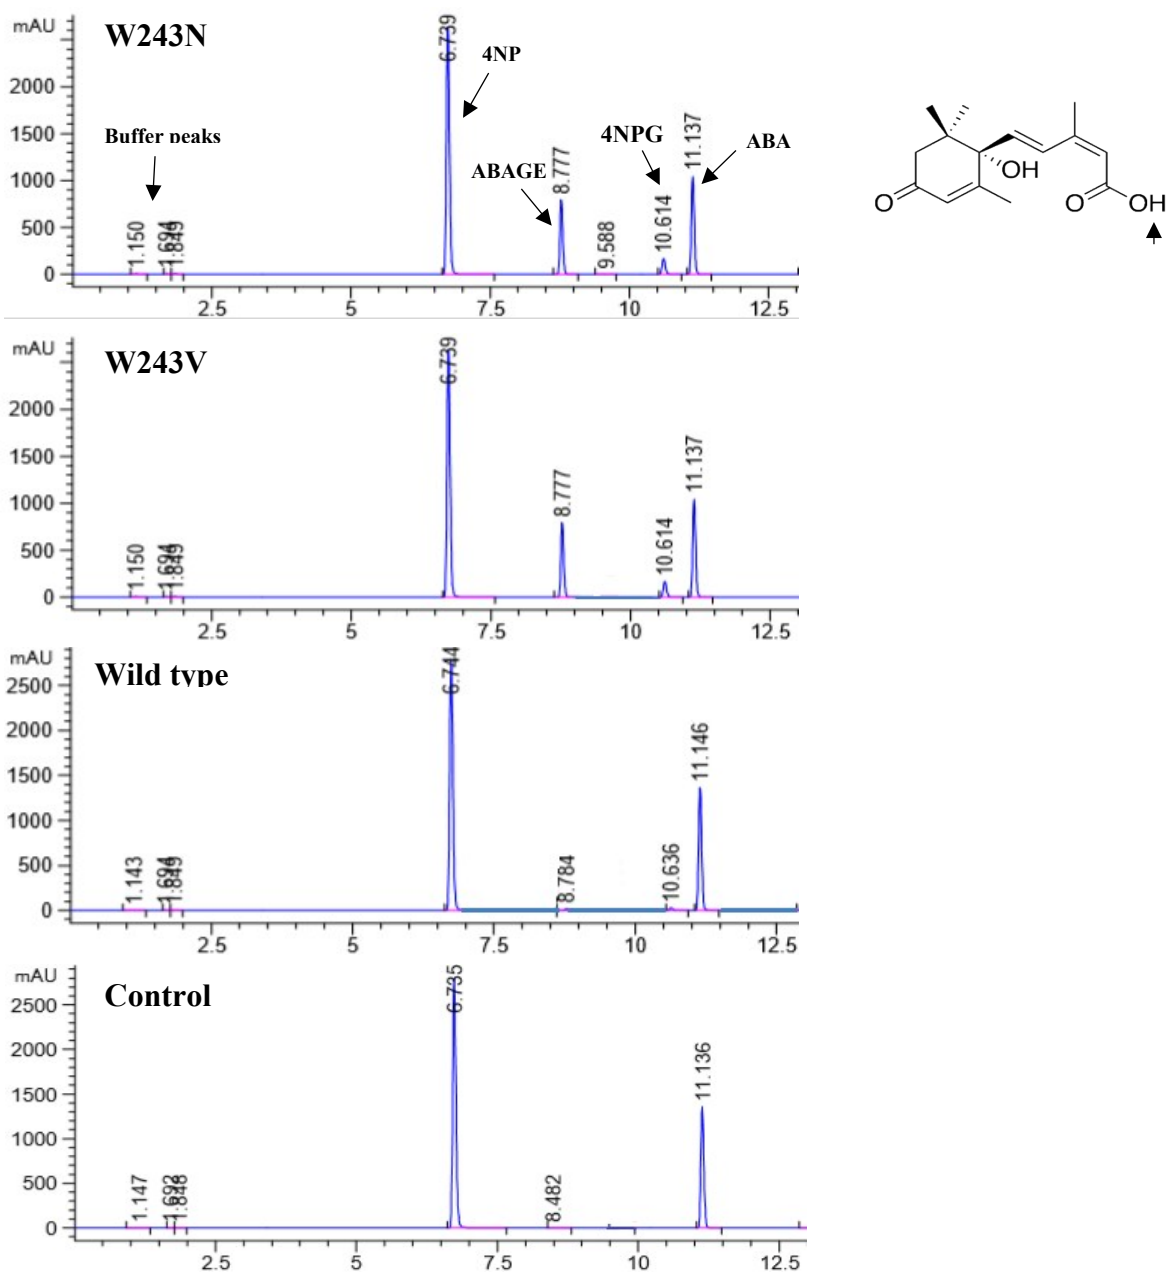

**Figure S8.** Chromatograms of reaction mixtures of Os9BGlu31 wild type and its W243N and W243V mutants with 4NPGlc and abscisic acid (ABA), a phytohormone acceptor, to produce abscisic acid glucose ester (ABA-GE). Os9BGlu31 wild type and its mutants are shown to catalyze the transfer to a carboxyl group to produce abscisic acid glucose ester. The product identity was confirmed by  $^1\text{H}$  NMR.
