# Supplementary material for: Engineering faster transglycosidases and their acceptor specificity
Source: Royal Society of Chemistry journal article supplement (doi:10.1039/c9gc00621d), 2019-01-01
Supplement: c9gc00621d2.xlsx [file c9gc00621d2.xlsx]

## Sheet: Initial screening
Enzyme	WT		W243C		W243E		W243G		W243H		W243I		W243K		W243L		W243N		W243P		W243Q		W243R		W243S		W243T		W243V		I172T		L183Q		L241D		I172TW243N		L183QW243N		L241DW24N
Acceptor	Area	Rate / nmol 4NP min-1 mg-1	Area	Rate / nmol 4NP min-1 mg-1	Area	Rate / nmol 4NP min-1 mg-1	Area	Rate / nmol 4NP min-1 mg-1	Area	Rate / nmol 4NP min-1 mg-1	Area	Rate / nmol 4NP min-1 mg-1	Area	Rate / nmol 4NP min-1 mg-1	Area	Rate / nmol 4NP min-1 mg-1	Area	Rate / nmol 4NP min-1 mg-1	Area	Rate / nmol 4NP min-1 mg-1	Area	Rate / nmol 4NP min-1 mg-1	Area	Rate / nmol 4NP min-1 mg-1	Area	Rate / nmol 4NP min-1 mg-1	Area	Rate / nmol 4NP min-1 mg-1	Area	Rate / nmol 4NP min-1 mg-1	Area	Rate / nmol 4NP min-1 mg-1	Area	Rate / nmol 4NP min-1 mg-1	Area	Rate / nmol 4NP min-1 mg-1	Area	Rate / nmol 4NP min-1 mg-1	Area	Rate / nmol 4NP min-1 mg-1	Area	Rate / nmol 4NP min-1 mg-1
1-Naphthaleneacetic acid	15.5	185.345	39.7	1898.47	51.3	981.246	40.1	958.8	20.4	487.833	22.6	2161.71	28.6	91.1827	45.4	4342.03	34.5	3299.68	29.4	281.198	36.8	879.907	37.1	118.277	28.5	681.479	62.5	2988.63	46.8	1118.98	28.6	68.387	17.4	416.112	10.8	16.1454	45.1	107.833	56.2	1343.7	23	2749.96
1-Naphthol	7	83.7401	12.2	583.593	32.6	623.598	14.8	353.954	18.1	432.847	5.9	564.73	35.8	114.133	22.7	2171.28	12.4	1186.31	14.4	137.757	24.1	576.289	37	117.958	16.8	401.768	21.2	1013.92	24.6	588.242	13.6	32.5266	5.6	134.01	3	4.49078	36.9	88.2298	88	2103.94	11	1315.54
4-Coumaric acid	23	274.996	26.4	1262.55	38.7	740.264	37.6	899.033	24.2	578.68	10.1	966.367	23.3	74.2884	21.2	2027.83	32.5	3108.43	40.2	384.476	41.5	992.27	37.6	119.871	30.6	731.684	38.4	1836.32	53.4	1276.76	34.1	81.5358	25.4	607.368	10	14.9501	35.7	85.3609	62	1482.36	29.4	3514.98
4-Hydroxybenzoic acid	27.1	324.005	29.1	1391.65	48.2	921.957	40.8	975.535	20.3	485.442	15.1	1444.51	24	76.5198	26.5	2534.66	27.1	2592.04	34.5	329.968	39.1	934.893	43	137.084	24.4	583.461	42.2	2018.01	46.7	1116.59	34.1	81.5358	25.4	607.368	10	14.9501	35.7	85.3609	44.6	1066.38	24	2869.49
6-Hydroxyflavone	23.9	285.754	14.4	688.783	28.7	549.009	34.3	820.14	18.4	440.019	6.7	641.232	38.2	121.784	13.8	1320.19	17.8	1702.7	11.9	113.85	35.8	856	44	140.272	32.5	777.107	22.3	1066.51	55.2	1319.79	18	43.0457	7.8	186.606	9.6	14.3524	56.1	134.131	83.5	1996.36	15.7	1877.35
Abscisic acid	5	59.8331	16.7	798.755	36.4	696.275	37.2	889.47	8.2	196.169	7.3	698.609	22.2	70.7821	9.4	899.427	9	861.176	28.1	268.767	30.9	738.856	17.8	56.7567	17.6	420.894	20.7	990.011	41	980.316	19	45.4363	6.9	165.089	10	14.9501	32.8	78.4279	38.1	910.986	10.1	1207.96
Apigenin	13.8	165.024	11.6	554.904	12.5	239.175	19.7	471.098	2.8	67.071	3.3	316.098	21.5	68.5508	4.4	421.289	6.3	602.981	18.2	174.095	16.3	389.815	22.7	72.3759	14	334.829	19.7	942.197	21.6	516.522	13.8	33.0047	8.5	203.341		0.00822473	34.7	82.9702	42	1004.22	3.4	407.076
Caffeic acid	21.1	252.284	28.7	1372.52	77.1	1474.69	40.6	970.753	23	549.991	14.2	1358.44	14.8	47.1939	35.4	3385.75	26.6	2544.22	42	401.689	45.6	1090.29	24.5	78.1136	29.4	702.996	31.1	1487.27	45.5	1087.9	47.5	113.571	28.1	671.917	9.8	14.6512	39.4	94.2065	45.2	1080.73	33.1	3957.26
Chloramphenicol	4.6	55.0518	10.4	497.528	18.4	352.015	8.4	200.95	4.7	112.494	4.7	449.977	53.22	169.661	5.1	488.228	10.5	1004.62	11.4	109.068	16.2	387.424	20.9	66.6382	8.3	198.559	16.6	793.974	19.8	473.489	25.5	60.9759	6.6	157.917		0.00822473	65.1	155.647	58.6	1401.08	8.3	992.796
Chrysin	5.6	67.0052	18.2	870.476	36.5	698.188	19.6	468.708	11.2	267.889	9.3	889.865	67.85	216.296	19.9	1903.52	17.3	1654.89	22.9	219.04	21.6	516.522	21.11	67.3076	15.3	365.908	26	1243.42	24.1	576.289	18	43.0457	7.8	186.606	9.6	14.3524	56.1	134.131	83.5	1996.36	15.7	1877.35
Ferulic acid	46	549.925	37	1769.38	47.6	910.482	51.3	1226.56	33.7	805.795	22.6	2161.71	25.1	80.0261	53.4	5107.05	39.3	3758.7	47	449.503	51.3	1226.56	55.1	175.654	33.3	796.233	47.2	2257.08	58.6	1401.08	41.5	99.227	28.4	679.089	16.1	24.0646	48	114.766	45.5	1087.9	39.1	4674.46
Gibberellin A4	6.4	76.568	8.1	387.556	27.9	533.708	7.6	181.824	8.7	208.122	4	383.037	16.2	51.6565	7.8	746.423	5	478.665	13.4	128.194	12.9	308.531	14.8	47.1939	1.2	28.8199	11	526.216	19.9	475.88	14.2	33.961	6.2	148.355	9.9	14.8006	45.8	109.507	24.7	590.633	8.6	1028.66
Hesperetin	7.7	92.1075	24.2	1157.36	25.9	495.457	6.3	150.745	2.7	64.6803	8	765.548	29.7	94.689	20.8	1989.58	15.9	1521.01	19.7	188.439	6.4	153.136	33.6	107.121	4.1	98.1501	29.6	1415.55	4.4	105.322	14.1	33.7219	5.7	136.401		0.00822473	35	83.6875	48.8	1166.79	8	956.936
Indole-1-acetic acid	24.7	295.317	27.3	1305.58	45.2	864.58	46.9	1121.37	27.6	659.963	13.8	1320.19	32.2	102.658	31.7	3031.93	22.5	2152.15	32.3	308.93	54	1291.11	39.7	126.565	33	789.061	40.5	1936.73	50	1195.48	37.3	89.186	36.4	870.344		0.00822473	56.5	135.087	87.5	2091.99	24.9	2977.07
Kaempferol	17.6	210.447	12.4	237.262	16.8	160.707	8.5	203.341	3.5	83.8059	5.6	107.208	15.4	49.1065	11.6	221.962	16.8	321.415	20	95.6541	14.1	337.219	22.8	72.6946	10.1	241.592	18.3	350.103	20.7	495.005	10.4	24.8764	4.8	114.885		0.00822473	26.7	63.8447	27.3	652.791	4.4	105.322
Luteolin	11.8	141.117	19.2	918.29	22.9	438.08	20.1	480.661	3.4	81.4152	3.3	316.098	17.6	56.1192	3.7	354.349	7.4	708.172	29.7	284.067	13.7	327.657	28.8	91.8202	13.3	318.094	35.6	1702.44	34.3	820.14	22.2	53.0866	13.9	332.438		0.00822473	94	224.738	80	1912.69	28	3347.63
Salicylic acid	11.5	137.531	17.2	822.662	29	554.746	15.9	380.252	26.8	640.838	11.6	1109.81	31.8	101.383	16.8	1607.07	17.5	1674.01	12.9	123.412	26.1	624.103	27.8	88.6326	19.7	471.098	20.2	966.104	35.9	858.391	14.7	35.1564	6.1	145.964	10	14.9501	32.5	77.7107	43.9	1049.65	13.7	1638.28
Sinapic acid	21	251.089	31.5	1506.4	47.5	908.569	35.4	846.437	24.1	576.289	12	1148.06	23.5	74.926	31.2	2984.11	23.8	2276.47	50.2	480.104	42	1004.22	48.3	153.978	29.1	695.824	31.6	1511.18	53	1267.2	34.5	82.4921	26.2	626.493		0.00822473	34.4	82.253	50.1	1197.87	35.3	4220.23
Syringic acid	26.1	312.051	27.7	1324.71	49.7	950.645	47.4	1133.32	19.5	466.317	15.3	1463.63	28.2	89.9076	40.5	3873.45	31.9	3051.05	40.3	385.433	29.1	695.824	40.5	129.115	29.2	698.214	50	2390.96	36.4	870.344	33.8	80.8186	44.5	1063.99	4.1	6.13438	26.1	62.4103	37.5	896.642	32.9	3933.35
trans-Cinnamic acid	23	274.996	19.7	942.197	46.1	881.793	34.4	822.53	19.6	468.708	10.3	985.492	24.8	79.0698	22.2	2123.46	16.9	1616.64	17.5	167.401	35.6	851.219	38.1	121.465	24.2	578.68	30.3	1449.02	40.5	968.363	30.1	71.9731	23.6	564.335	4.1	6.13438	38.4	91.8158	47.3	1130.93	18.3	2188.14
Vanillic acid	26.6	318.028	36.2	1731.13	50.6	967.858	47.1	1126.15	22.1	528.475	21.6	2066.09	30.7	97.8766	39.5	3777.82	29.4	2811.98	42.6	407.427	45.2	1080.73	37.7	120.19	31.8	760.372	63	3012.54	50	1195.48	38.4	91.8158	24.8	593.024	10.2	15.2489	35.7	85.3609	62	1482.36	29.4	3514.98
Water	8.6	102.866	11.2	535.779	22.5	430.43	17	406.55	4.7	112.494	3.7	354.349	29.3	93.414	5.9	564.73	7.6	727.297	10	95.6804	11	263.108	44.5	141.865	13.1	313.313	24.7	1181.27	16.8	401.768	17.2	41.1331	5.9	141.183	4.1	6.13438	31.3	74.8419	40.5	968.363	11	1315.54
Calibration curve
Area = a*Concentration (mM)+b
a	878.406
b	-0.0055045
Load Enzyme (µg)	Protein
0.1	W243I, W243L, W243N, L241DW243N
0.2	W243C, W243T
0.5	L183Q, W243E, W243G, W243H, W243Q, W243S, W243V, L183QW243N
1	Wild type, W243P
3	W243R, W243K
5	I172T, I172TW243N
8	L241D
Note:
For Kaempferol we increased the amount of protein in W243C, E,I, L, N, P, T, and L241DW243N
0.5	W243C, I, L,N, T and L241DW243N
1	W243E
2	W243P
Reaction time (min)	15
Reaction temperature (°C)	30
Volume injected (µL)	2
Reaction volume (µL)	Protein
157.5	WT, W243G, H, Q, S, V, I172T, L183Q, L241D, I172TW243N, L183QW243N, L241DW243N,
126	W243C, E, I, K, L, N, P, R, T
DMSO concentration (wt.%)	Acceptor
0	water
0.25	4-coumaric acid, ferulic acid, caffeic acid, trans-cinnamic acid, 4-hydroxybenzoic acid, vanillic acid, syringic acid, sinapic acid, salicylic acid, 1-naphthaleneacetic acid, 1-naphthol, 6-hydroxyflavone, chrysin
1.25	apigenin, hesperetin, kaempferol, luteoline

## Sheet: Epistasis
	Acceptor	Wild type	L183Q	Delta	L241D	Delta	I172T	Delta	W243N	Delta	L183QW243N	Delta obs	Delta expected	Dif relative	Epistasis type	MAX	MIN	Sign epistasis?	L241DW243N	Delta obs	Delta expected	Dif relative	Epistasis type	MAX	MIN	Sign epistasis?	I172TW243N	Delta obs	Delta exp	Dif relative	Epistasis type	MAX	MIN	Sign epistasis?
	1-Naphthaleneacetic acid	185.345	416.112	230.768	16.1454	-169.199	68.387	-116.958	3299.68	3114.34	1343.7	1158.36	3345.11	-1.62741	-	3114.34	230.768		2749.96	2564.61	2945.14	-0.138376		3114.34	-169.199		107.833	-77.5111	2997.38	-28.5152	-	2564.61	2564.61
	1-Naphthol	83.7401	134.01	50.2704	4.49078	-79.2493	32.5266	-51.2135	1186.31	1102.57	2103.94	2020.2	1152.84	0.412255	+	1102.57	50.2704		1315.54	1231.8	1023.32	0.158474		1102.57	-79.2493		88.2298	4.48968	1051.36	-11.8652	-	1231.8	1231.8
	4-Coumaric acid	274.996	607.368	332.372	14.9501	-260.046	81.5358	-193.46	3108.43	2833.43	1482.36	1207.37	3165.81	-1.32116	-	2833.43	332.372		3514.98	3239.98	2573.39	0.189644		2833.43	-260.046		85.3609	-189.635	2639.97	-33.1487	-	3239.98	3239.98
	4-Hydroxybenzoic acid	324.005	607.368	283.363	14.9501	-309.055	81.5358	-242.469	2592.04	2268.03	1066.38	742.376	2551.4	-1.69641	-	2268.03	283.363		2869.49	2545.49	1958.98	0.204394		2268.03	-309.055		85.3609	-238.644	2025.56	-26.5251	-	2545.49	2545.49
	6-Hydroxyflavone	285.754	186.606	-99.148	14.3524	-271.401	43.0457	-242.708	1702.7	1416.95	1996.36	1710.61	1317.8	0.196762		1416.95	-99.148		1877.35	1591.6	1145.55	0.237597		1416.95	-271.401		134.131	-151.623	1174.24	-9.88482	-	1591.6	1591.6
	Abscisic acid	59.8331	165.089	105.256	14.9501	-44.8831	45.4363	-14.3968	861.176	801.343	910.986	851.153	906.599	-0.0608643		801.343	105.256		1207.96	1148.13	756.46	0.324237	+	801.343	-44.8831	Y	78.4279	18.5948	786.946	-9.79691	-	1148.13	1148.13
	Apiginin	165.024	203.341	38.3169	0.00822473	-165.015	33.0047	-132.019	602.981	437.958	1004.22	839.199	476.274	0.361399	+	437.958	38.3169		407.076	242.052	272.942	-0.0758823		437.958	-165.015		82.9702	-82.0534	305.939	-4.67628	-	242.052	242.052
	Caffeic acid	252.284	671.917	419.633	14.6512	-237.633	113.571	-138.713	2544.22	2291.94	1080.73	828.441	2711.57	-1.74247	-	2291.94	419.633		3957.26	3704.97	2054.31	0.417123	+	2291.94	-237.633	Y	94.2065	-158.078	2153.23	-24.5345	-	3704.97	3704.97
	Chloramphenicol	55.0518	157.917	102.866	0.00822473	-55.0435	60.9759	5.9241	1004.62	949.566	1401.08	1346.03	1052.43	0.209549		949.566	102.866		992.796	937.744	894.523	0.0435353		949.566	-55.0435		155.647	100.596	955.49	-5.49251	-	937.744	937.744
	Chrysin	67.0052	186.606	119.601	14.3524	-52.6528	43.0457	-23.9596	1654.89	1587.88	1996.36	1929.36	1707.48	0.111139		1587.88	119.601		1877.35	1810.35	1535.23	0.146546		1587.88	-52.6528		134.131	67.1259	1563.92	-11.1592	-	1810.35	1810.35
	Ferulic acid	549.925	679.089	129.163	24.0646	-525.861	99.227	-450.698	3758.7	3208.77	1087.9	537.972	3337.94	-2.57374	-	3208.77	129.163		4674.46	4124.54	2682.91	0.308405	+	3208.77	-525.861		114.766	-435.159	2758.07	-27.8237	-	4124.54	4124.54
	Gibberellin A4	76.568	148.355	71.7866	14.8006	-61.7674	33.961	-42.607	478.665	402.097	590.633	514.065	473.884	0.0680308		402.097	71.7866		1028.66	952.088	340.33	0.594716	+	402.097	-61.7674	Y	109.507	32.9389	359.49	-2.98201	-	952.088	952.088
	Hesperetin	92.1075	136.401	44.2936	0.00822473	-92.0993	33.7219	-58.3856	1521.01	1428.9	1166.79	1074.68	1473.19	-0.341545	-	1428.9	44.2936		956.936	864.828	1336.8	-0.493213	-	1428.9	-92.0993		83.6875	-8.42007	1370.51	-16.4772	-	864.828	864.828
	Indole-1-acetic acid	295.317	870.344	575.028	0.00822473	-295.308	89.186	-206.13	2152.15	1856.83	2091.99	1796.67	2431.86	-0.30363	-	1856.83	575.028		2977.07	2681.76	1561.53	0.376286	+	1856.83	-295.308	Y	135.087	-160.229	1650.7	-13.4056	-	2681.76	2681.76
	Kaempferol	210.447	114.885	-95.562	0.00822473	-210.439	24.8764	-185.57	321.415	110.968	652.791	442.344	15.4057	0.65402	+	110.968	-95.562	Y	105.322	-105.125	-99.471	-0.0536808		110.968	-210.439		63.8447	-146.602	-74.6028	-1.12773	-	-105.125	-105.125
	Luteolin	141.117	332.438	191.321	0.00822473	-141.109	53.0866	-88.0302	708.172	567.055	1912.69	1771.57	758.376	0.529723	+	567.055	191.321		3347.63	3206.51	425.947	0.830608	+	567.055	-141.109	Y	224.738	83.6217	479.025	-1.75939	-	3206.51	3206.51
	Salicylic acid	137.531	145.964	8.43323	14.9501	-122.581	35.1564	-102.374	1674.01	1536.48	1049.65	912.116	1544.91	-0.602869	-	1536.48	8.43323		1638.28	1500.75	1413.9	0.0530139		1536.48	-122.581		77.7107	-59.82	1434.11	-19.2242	-	1500.75	1500.75
	Sinapic acid	251.089	626.493	375.405	0.00822473	-251.08	82.4921	-168.597	2276.47	2025.38	1197.87	946.781	2400.78	-1.21382	-	2025.38	375.405		4220.23	3969.14	1774.3	0.520077	+	2025.38	-251.08	Y	82.253	-168.836	1856.78	-24.6267	-	3969.14	3969.14
	Syringic acid	312.051	1063.99	751.939	6.13438	-305.917	80.8186	-231.233	3051.05	2739	896.642	584.59	3490.94	-3.24137	-	2739	751.939		3933.35	3621.3	2433.08	0.302087	+	2739	-305.917	Y	62.4103	-249.641	2507.77	-44.182	-	3621.3	3621.3
	trans-cinnamic acid	274.996	564.335	289.34	6.13438	-268.861	71.9731	-203.023	1616.64	1341.64	1130.93	855.934	1630.98	-0.685317	-	1341.64	289.34		2188.14	1913.15	1072.78	0.384056	+	1341.64	-268.861	Y	91.8158	-183.18	1138.62	-14.3962	-	1913.15	1913.15
	Vanillic acid	318.028	593.024	274.996	15.2489	-302.779	91.8158	-226.212	2811.98	2493.95	1482.36	1164.33	2768.95	-1.08247	-	2493.95	274.996		3514.98	3196.95	2191.18	0.28614		2493.95	-302.779		85.3609	-232.667	2267.74	-29.2922	-	3196.95	3196.95
	Water	102.866	141.183	38.3169	6.13438	-96.7313	41.1331	-61.7325	727.297	624.432	968.363	865.497	662.749	0.209372		624.432	38.3169		1315.54	1212.67	527.7	0.520679	+	624.432	-96.7313	Y	74.8419	-28.0238	562.699	-7.89295	-	1212.67	1212.67
