# Supplementary material for: Engineering faster transglycosidases and their acceptor specificity
Source: Royal Society of Chemistry journal article supplement (doi:10.1039/c9gc00621d), 2019-01-01
Supplement: c9gc00621d3.xlsx [file c9gc00621d3.xlsx]

## Sheet: Selected mutants
Enzyme	WT								W243C								W243I								W243L								W243N								W243T								W243V
Acceptor	Area			Rate / nmol 4NP min-1 mg-1			Average	s	Area			Rate / nmol 4NP min-1 mg-1			Average	s	Area			Rate / nmol 4NP min-1 mg-1			Average	s	Area			Rate / nmol 4NP min-1 mg-1			Average	s	Area			Rate / nmol 4NP min-1 mg-1			Average	s	Area			Rate / nmol 4NP min-1 mg-1			Average	s	Area
1-Naphthaleneacetic acid	8.3	8.2	11.1	198.559	196.169	265.499	220.075	39.3558	10.1	10.9	11.7	483.183	521.434	559.686	521.434	38.2511	17.2	17.3	14.3	822.662	827.443	684.002	778.036	81.4709	22.5	24.3	23.8	1345.09	1452.68	1422.79	1406.85	55.5333	21.7	24.2	24.2	1297.28	1446.7	1446.7	1396.89	86.2667	17.7	18.2	18.3	846.569	870.476	875.257	864.101	15.37	10.8
1-Naphthol	1.6	2.3	1.8	38.3827	55.1176	43.1641	45.5548	8.61977	3	3.1	3.4	143.705	148.486	162.83	151.674	9.95325	3.9	4.3	4.7	186.737	205.863	224.988	205.863	19.1256	12.1	11.5	13.1	723.514	687.654	783.281	731.483	48.3094	3	2.1	2.2	179.631	125.84	131.817	145.763	29.4825	3	2.6	3.1	143.705	124.579	148.486	138.923	12.6504	2.3
4-Coumaric acid	13.9	11.9	12.2	332.438	284.624	291.796	302.953	25.7855	6	8.5	7.4	287.146	406.681	354.086	349.305	59.9106	14.5	12.3	15.1	693.564	588.374	722.253	668.064	70.4883	21	21	20.3	1255.44	1255.44	1213.61	1241.5	24.1547	16.3	17.2	16.2	974.537	1028.33	968.56	990.475	32.9173	16.4	18.4	15.6	784.411	880.039	746.16	803.536	68.9582	8.8
4-Hydroxybenzoic acid	11.1	11.5	11.6	265.499	275.061	277.452	272.671	6.32518	6.3	8.4	7.4	301.491	401.9	354.086	352.492	50.2235	10	10.8	11	478.402	516.653	526.216	507.09	25.3007	12.8	15.5	16.6	765.351	926.723	992.467	894.847	116.865	9.9	10.3	11.3	592.026	615.933	675.7	627.886	43.0988	10.2	12.2	10.2	487.965	583.593	487.965	519.841	55.2107	7.3
6-Hydroxyflavone	2	2.2	1.6	47.9455	52.7269	38.3827	46.3517	7.30369	3.1	3.9	3	148.486	186.737	143.705	159.643	23.586	4	6.4	3.9	191.519	306.272	186.737	228.176	67.6754	8.8	6.1	6.2	526.282	364.91	370.887	420.693	91.4916	13.2	11.2	12	789.258	669.723	717.537	725.506	60.1645	6.4	5	4.8	306.272	239.333	229.77	258.458	41.6832	4.1
Apigenin	2.5	2.5	2.5	59.8989	59.8989	59.8989	59.8989	0	1.9	1.4	1.4	91.1096	67.2026	67.2026	75.1716	13.8027	2.2	1.9	1.7	105.454	91.1096	81.5468	92.7034	12.0329	1.8	1.4	1.5	107.91	84.0033	89.98	93.9645	12.4416	1.8	1.7	1.8	107.91	101.933	107.91	105.918	3.45067	2.1	2	2.2	100.672	95.891	105.454	100.672	4.78139	2.4
Caffeic acid	14.7	13	12	351.564	310.922	287.015	316.5	32.6339	14.4	14.5	10.8	688.783	693.564	516.653	633	100.788	18.1	17.4	18.6	865.694	832.225	889.601	862.507	28.8208	20.1	20.3	18.5	1201.65	1213.61	1106.02	1173.76	58.9651	25.7	26	24.6	1536.35	1554.28	1470.61	1520.41	44.0552	25.5	26.5	25.2	1219.52	1267.33	1205.17	1230.67	32.5462	24.2
Chrysin	1	1.3	2	24.0385	31.2106	47.9455	34.3982	12.2681	2.2	2.5	2.4	105.454	119.798	115.017	113.423	7.30369	4	3.4	3.4	191.519	162.83	162.83	172.393	16.5632	6.7	6.6	4.9	400.77	394.794	293.189	362.918	60.4606	9.3	8.9	10.1	556.165	532.258	603.979	564.134	36.5185	10.2	9.7	9.4	487.965	464.058	449.714	467.245	19.3237	4.2
Ferulic acid	18.1	17.1	14.8	432.847	408.94	353.954	398.581	40.4539	9.7	8.3	6.9	464.058	397.118	330.179	397.118	66.9394	15.5	14.3	13.3	741.378	684.002	636.188	687.189	52.6677	22.6	22.3	19.8	1351.07	1333.14	1183.72	1289.31	91.8812	17.5	18.3	16.1	1046.26	1094.07	962.583	1034.3	66.5541	15.3	17.4	16.4	731.816	832.225	784.411	782.817	50.2235	9.1
Hesperetin	4.5	4.6	4.5	53.8564	55.0518	53.8564	54.2549	0.690134	2.4	2.3	2.1	57.5083	55.1176	50.3362	54.3207	3.65185	3.1	2.9	3	74.2431	69.4617	71.8524	71.8524	2.39069	5.2	3.2	5	124.448	76.6338	119.666	106.916	26.3338	4.2	2.8	4.6	100.541	67.071	110.104	92.5718	22.596	7.1	6.1	6.6	169.871	145.964	157.917	157.917	11.9535	5.8
Kaempferol	4.7	4.7	6.1	56.2471	56.2471	72.982	61.8254	9.66187	3.1	2.8	3	74.2431	67.071	71.8524	71.0555	3.65185	4.1	3.9	2.9	98.1501	93.3687	69.4617	86.9935	15.37	3.5	3.2	3.2	83.8059	76.6338	76.6338	79.0245	4.1408	2.5	2.2	2.2	59.8989	52.7269	52.7269	55.1176	4.1408	6.3	6.2	6.4	150.745	148.355	153.136	150.745	2.39069	3.2
Luteoline	0.8	0.7	1.3	9.62857	8.43323	15.6053	11.2224	3.8425	0.7	0.8	0.8	16.8665	19.2571	19.2571	18.4603	1.38027	1	0.8	1.1	24.0385	19.2571	26.4292	23.2416	3.65185	1.1	0.8	1.2	26.4292	19.2571	28.8199	24.8354	4.97663	1.5	1.6	1.7	35.992	38.3827	40.7734	38.3827	2.39069	1.1	0.9	1.1	26.4292	21.6478	26.4292	24.8354	2.76054	1
Salicylic acid	2.1	3.1	3.4	50.3362	74.2431	81.4152	68.6648	16.2731	3.2	4.3	4.8	153.268	205.863	229.77	196.3	39.1373	5.2	5.3	5.8	248.895	253.677	277.584	260.052	15.37	10.4	9.2	9.4	621.909	550.189	562.142	578.08	38.425	7.2	8.5	10.1	430.654	508.351	603.979	514.328	86.8171	5.1	6.5	7.7	244.114	311.053	368.43	307.866	62.2193	3
Sinapic acid	10.9	9.5	12.4	260.717	227.248	296.578	261.514	34.6719	9.1	11.2	11.2	435.37	535.779	535.779	502.309	57.9712	12.3	14.3	14.3	588.374	684.002	684.002	652.126	55.2107	16.8	16.6	17.1	1004.42	992.467	1022.35	1006.41	15.0411	20.2	20.5	22	1207.63	1225.56	1315.21	1249.47	57.6375	18.5	18.6	19.1	884.82	889.601	913.508	895.977	15.37	15.1
Syringic acid	4	4.7	4.1	95.7594	112.494	98.1501	102.135	9.05102	4	5.9	4.7	191.519	282.365	224.988	232.957	45.9445	6.8	7.2	6.9	325.398	344.523	330.179	333.367	9.95325	6.2	7.5	7.9	370.887	448.584	472.491	430.654	53.1224	4.2	4.1	3.5	251.352	245.375	209.515	235.414	22.6276	3.2	3.6	4.3	153.268	172.393	205.863	177.175	26.6216	3.5
trans-Cinnamic acid	10.1	9	10.5	241.592	215.294	251.154	236.013	18.5696	9.4	10.6	9.7	449.714	507.09	464.058	473.621	29.8598	12.4	12.6	12.9	593.155	602.718	617.062	604.312	12.0329	19.9	21.8	22.1	1189.7	1303.26	1321.19	1271.38	71.3046	16.7	15.4	16.4	998.444	920.746	980.514	966.568	40.6828	14.8	15.2	16.4	707.909	727.034	784.411	739.785	39.813	14.4
Vanillic acid	12.6	13.2	9.5	301.359	315.703	227.248	281.437	47.474	9.5	10.5	11	454.495	502.309	526.216	494.34	36.5185	15.5	14.7	14.9	741.378	703.127	712.69	719.065	19.9065	20.6	18.5	19.8	1231.54	1106.02	1183.72	1173.76	63.3459	20.9	23.4	20.9	1249.47	1398.89	1249.47	1299.27	86.2667	13.2	16.2	15.8	631.406	774.848	755.723	720.659	77.8843	17
Water	1.1	1.3	1.5	26.4292	31.2106	35.992	31.2106	4.78139	1.3	1.5	1.5	62.4212	71.984	71.984	68.7964	5.52107	1.6	1.8	1.6	76.7654	86.3282	76.7654	79.953	5.52107	3.5	3.2	3.2	209.515	191.585	191.585	197.561	10.352	4.5	4.2	4.1	269.282	251.352	245.375	255.336	12.4416	3.4	3.7	3	162.83	177.175	143.705	161.237	16.7917	2
Mutant	WT	C	I	L	N	T	V	QN	DN
Enzyme load (µg)	0.5	0.25	0.25	0.2	0.2	0.25	0.25	1	0.2
For Hesperitin, Kaempferol and Luteoline we used higher enzyme loads
Mutant	WT	C	I	L	N	T	V	QN	DN
Enzyme load (µg)	1	0.5	0.5	0.5	0.5	0.5	0.5	1	0.5
Calibration curve
Area = a*Concentration(mM) + b
a	878.406
b	-0.0055045
Reaction volume (µL)	157.5
Reaction time (min)	15
Vol. injected/Vol. standard	1
DMSO concentration (wt.%)	2.5
[truncated: 23 more columns]
