# Supplementary material for: Engineering faster transglycosidases and their acceptor specificity
Source: Royal Society of Chemistry journal article supplement (doi:10.1039/c9gc00621d), 2019-01-01
Supplement: c9gc00621d4.xlsx [file c9gc00621d4.xlsx]

## Sheet: Molecular descriptors
	Acceptor	SMILES	Smax38	Smax39	Geto	Chi5ch	Smax35	Smax36	Smax37	Smax30	Smax31	Smax32	Smax33	bcutv8	bcutv9	bcutv6	bcutv7	bcutv4	bcutv5	bcutv2	bcutv3	QNmin	bcutv1	SPP	Platt	Smax34	S44	S45	S46	S47	S40	S41	S42	S43	S48	S49	GATSp5	GATSp4	GATSp7	GATSp6	GATSp1	bcute13	GATSp3	GATSp2	GATSp8	Smin78	Chiv6ch	Tac	Smin72
	1-Naphthaleneacetic acid	c1ccc2c(c1)cccc2CC(=O)O	0	0	2.034	0	0	0	0	0	0	0	8.726	1.206	2.095	2.272	1.781	2.781	2.513	3.377	3.144	0	4.019	0.788	40	10.612	0	0	0	0	0	0	0	0	0	0	1.896	0.948	3.792	3.25	0.506	0.627	0.399	0.379	0	0	0.052	2.4	0
	1-Naphthol	c1ccc2c(c1)cccc2O	0	0	2.097	0	0	0	0	0	0	0	9.371	0.936	2.083	1.517	1.093	2.514	2.301	3.315	2.91	0	3.998	0.8	32	0	0	0	0	0	0	0	0	0	0	0	1.833	1.833	0	0	0.458	0.489	1.1	0.687	0	0	0.052	1.763	0
	4-Coumaric acid	c1cc(ccc1/C=C/C(=O)O)O	0	0	1.861	0	0	0	0	0	0	0	8.894	1.069	1.947	1.458	1.243	2.648	2.193	3.313	2.713	0	3.822	0.836	30	10.103	0	0	0	0	0	0	0	0	0	0	1.528	0.917	2.444	2.037	0.611	0.387	0.815	0.652	0	0	0.028	2.896	0
	4-Hydroxybenzoic acid	c1cc(ccc1C(=O)O)O	0	0	1.835	0	0	0	0	0	0	0	8.746	0.499	1.935	1.218	1.069	2.279	1.444	2.979	2.648	0	3.798	0.843	26	10.231	0	0	0	0	0	0	0	0	0	0	2.143	1.786	0	0	0.643	0	1.169	0.659	0	0	0.028	2.718	0
	6-Hydroxyflavone	c1ccc(cc1)c2cc(=O)c3cc(ccc3o2)O	0	0	2.12	0	0	5.673	0	0	0	0	9.36	2.093	2.143	2.648	2.381	2.88	2.685	3.757	3.32	0	4.015	0.801	56	11.954	0	0	0	0	0	0	0	0	0	0	0.85	1.183	0.68	0.729	0.68	0.799	1.214	0.971	1.133	0	0.071	3.154	0
	Apigenin	c1cc(ccc1c2cc(=O)c3c(cc(cc3o2)O)O)O	0	0	2.048	0	0	5.529	0	0	0	0	9.678	2.132	2.145	2.648	2.438	2.904	2.689	3.764	3.327	0	4.019	0.801	64	12.021	0	0	0	0	0	0	0	0	0	0	0.965	0.874	1.182	0.8	0.691	0.799	1.152	0.95	1.382	0	0.063	4.802	0
	Caffeic acid	c1cc(c(cc1/C=C/C(=O)O)O)O	0	0	1.831	0	0	0	0	0	0	0	9.034	1.236	1.952	1.6	1.331	2.676	2.193	3.317	2.723	0	3.828	0.832	34	10.126	0	0	0	0	0	0	0	0	0	0	1.444	1.083	1.3	1.857	0.667	0.387	0.867	0.765	0	0	0.024	3.757	0
	Chrysin	c1ccc(cc1)c2cc(=O)c3c(cc(cc3o2)O)O	0	0	2.081	0	0	5.57	0	0	0	0	9.674	2.106	2.145	2.648	2.43	2.895	2.673	3.758	3.324	0	4.019	0.801	60	12.003	0	0	0	0	0	0	0	0	0	0	0.998	0.916	1.096	0.838	0.679	0.799	1.195	0.95	1.425	0	0.068	4.093	0
	Ferulic acid	COc1cc(ccc1O)/C=C/C(=O)O	0	0	1.842	0	4.861	0	0	0	0	0	9.247	1.242	1.958	2.192	1.45	2.703	2.502	3.321	2.852	0	3.832	0.832	36	10.227	0	0	0	0	0	0	0	0	0	0	1.241	1.05	1.137	1.706	0.813	0.693	0.803	0.758	1.137	0	0.024	3.734	0
	Hesperetin	COc1ccc(cc1O)[C@@H]2CC(=O)c3c(cc(cc3O2)O)O	0	0	2.017	0	5.686	0	0	0	0	0	9.826	2.443	2.029	2.681	2.601	2.907	2.735	3.766	3.268	0	3.899	0.801	70	12.201	0	0	0	0	0	0	0	0	0	0	0.902	0.92	1.203	0.875	0.802	0.883	1.076	0.962	1.283	0	0.066	5.739	0
	Kaempferol	c1cc(ccc1c2c(c(=O)c3c(cc(cc3o2)O)O)O)O	0	0	2.018	0	0	5.409	0	0	0	0	9.97	2.14	2.148	2.648	2.47	2.904	2.69	3.764	3.338	0	4.022	0.801	68	12.12	0	0	0	0	0	0	0	0	0	0	1.077	0.99	0.961	0.889	0.71	0.799	1.072	0.961	1.273	0	0.061	5.788	0
	Luteoline	c1cc(c(cc1c2cc(=O)c3c(cc(cc3o2)O)O)O)O	0	0	2.018	0	0	5.472	0	0	0	0	9.682	2.132	2.146	2.674	2.439	2.908	2.697	3.77	3.329	0	4.02	0.801	68	12.043	0	0	0	0	0	0	0	0	0	0	0.913	0.903	1.167	0.889	0.71	0.812	1.102	0.961	1.436	0	0.06	5.671	0
	Salicylic acid	c1ccc(c(c1)C(=O)O)O	0	0	1.835	0	0	0	0	0	0	0	8.9	0.839	1.935	1.228	0.9	2.264	1.452	2.961	2.681	0	3.799	0.846	26	10.262	0	0	0	0	0	0	0	0	0	0	2.143	1.339	0	0	0.643	0	1.25	0.659	0	0	0.028	2.827	0
	Sinapic acid	COc1cc(cc(c1O)OC)/C=C/C(=O)O	0	0	1.828	0	4.924	0	0	0	0	0	9.6	1.441	1.968	2.45	2.192	2.796	2.601	3.327	2.906	0	3.842	0.83	42	10.35	0	0	0	0	0	0	0	0	0	0	1.227	1.033	0.727	1.388	0.955	0.762	0.793	0.831	1.455	0	0.021	4.589	0
	Syringic acid	COc1cc(cc(c1O)OC)C(=O)O	0	0	1.805	0	4.785	0	0	0	0	0	9.452	1.218	1.959	2.275	1.427	2.656	2.45	3.023	2.906	0	3.82	0.837	38	10.656	0	0	0	0	0	0	0	0	0	0	0.778	1.308	0	1.156	1.011	0.644	0.963	0.851	0	0	0.021	4.427	0
	trans-Cinnamic acid	c1ccc(cc1)/C=C/C(=O)O	0	0	1.898	0	0	0	0	0	0	0	8.288	1.04	1.941	1.26	1.069	2.648	2.165	3.307	2.687	0	3.817	0.806	26	10.086	0	0	0	0	0	0	0	0	0	0	1.746	0.873	3.056	2.444	0.556	0.367	0.611	0.47	0	0	0.032	2.188	0
	Vanillic acid	COc1cc(ccc1O)C(=O)O	0	0	1.817	0	4.722	0	0	0	0	0	9.099	1.062	1.947	1.435	1.218	2.509	2.277	3.01	2.813	0	3.809	0.839	32	10.443	0	0	0	0	0	0	0	0	0	0	0.884	1.5	0	1.031	0.859	0.441	1.031	0.773	0	0	0.024	3.564	0
	Water	O
	Number of descriptors	2956
[truncated: 2,909 more columns]

## Sheet: ANN Training and validation
Molecule	logP	MR	TPSA	Enzyme	Sample	Rate (Target)	Rate - Output (17. MLP 12-3-1)	Rate - Output (22. MLP 12-5-1)	Rate - Output (30. MLP 12-7-1)	Rate - Output (32. MLP 12-3-1)	Rate - Output (38. MLP 12-5-1)	Rate - Output (41. MLP 12-7-1)	Rate - Output (46. MLP 12-3-1)	Rate - Output (53. MLP 12-5-1)	Rate - Output (58. MLP 12-7-1)	Rate - Output (63. MLP 12-7-1)	Rate - Output (Ensemble)
1-Naphthaleneacetic acid	2.467	55.493	37.3	WT	Train	220.075	145.877	184.052	314.383	126.859	356.629	302.215	186.304	261.703	335.202	213.989	242.721
1-Naphthol	2.545	45.971	20.23	WT	Test	45.5548	147.484	118.335	342.504	137.964	290.87	269.797	178.739	226.877	260.651	64.9732	203.819
4-Coumaric acid	1.49	45.135	57.53	WT	Test	302.953	142.458	161.434	310.952	131.618	274.052	229.445	171.534	218.04	252.085	167.688	205.931
4-Hydroxybenzoic acid	1.09	35.424	57.53	WT	Train	272.671	133.034	108.867	325.518	135.772	186.264	172.666	125.298	157.082	140.5	69.7345	155.473
6-Hydroxyflavone	3.166	69.943	50.44	WT	Train	46.3517	139.676	52.2873	228.744	98.1455	161.064	178.234	97.2801	155.168	151.254	90.8097	135.266
Apigenin	2.577	73.989	90.9	WT	Train	59.8989	136.069	-9.76828	162.501	81.6756	-15.4659	34.5807	35.2036	42.0374	28.1699	18.5397	51.3543
Caffeic acid	1.196	47.158	77.76	WT	Train	316.5	140.797	110.355	257.577	121.863	212.261	188.675	171.493	233.185	275.623	131.22	184.305
Chrysin	2.871	71.966	70.67	WT	Train	34.3982	137.754	18.6694	194.391	89.6016	73.043	107.179	64.0896	90.765	72.9271	55.0072	90.3427
Ferulic acid	1.499	51.627	66.76	WT	Train	398.581	143.3	204.088	295.281	125.356	330.899	257.126	181.117	244.963	309.02	264.576	235.573
Hesperetin	2.519	78.063	96.22	WT	Train	54.2549	135.444	32.0216	171.363	79.2334	24.2268	51.8363	25.4414	26.9759	17.8409	128.848	69.3232
Kaempferol	2.282	76.012	111.13	WT	Test	61.8254	134.6	-33.0843	132.877	74.3658	-103.449	-38.9288	17.7488	18.5023	13.7147	-17.2628	19.9085
Luteoline	2.282	76.012	111.13	WT	Train	11.2224	134.6	-33.0843	132.877	74.3658	-103.449	-38.9288	17.7488	18.5023	13.7147	-17.2628	19.9085
Salicylic acid	1.09	35.424	57.53	WT	Train	68.6648	133.034	108.867	325.518	135.772	186.264	172.666	125.298	157.082	140.5	69.7345	155.473
Sinapic acid	1.507	58.119	75.99	WT	Train	261.514	142.798	242.862	281.874	118.349	390.341	283.715	171.01	251.011	327.804	362.129	257.189
Syringic acid	1.108	48.408	75.99	WT	Train	102.135	141.493	204.388	292.628	126.427	306.126	231.859	175.356	231.038	280.012	263.511	225.284
trans-Cinnamic acid	1.784	43.112	37.3	WT	Test	236.013	144.218	220.173	369.942	141.845	335.736	270.239	162.457	195.815	215.233	204.155	225.981
Vanillic acid	1.099	41.916	66.76	WT	Train	281.437	138.96	160.081	308.664	131.939	245.845	202.929	157.673	197.907	213.293	166.623	192.391
Water	0	0	0	WT	Train	31.2106	-425.065	118.561	360.62	-5.3368	-66.0292	-22.6104	11.2321	12.3175	11.2257	342.227	33.7141
1-Naphthaleneacetic acid	2.467	55.493	37.3	W243C	Train	521.434	270.665	498.993	267.113	332.098	484.369	491.988	364.045	450.998	475.082	332.543	396.79
1-Naphthol	2.545	45.971	20.23	W243C	Test	151.674	302.108	392.259	296.801	369.489	469.421	445.262	355.64	404.504	414.441	183.528	363.345
4-Coumaric acid	1.49	45.135	57.53	W243C	Test	349.305	291.301	458.115	263.843	353.358	420.52	399.429	347.555	397.319	387.942	286.243	360.563
4-Hydroxybenzoic acid	1.09	35.424	57.53	W243C	Train	352.492	313.411	366.086	275.174	379.563	357.726	321.514	284.921	302.711	250.551	188.289	303.995
6-Hydroxyflavone	3.166	69.943	50.44	W243C	Train	159.643	217.591	231.717	159.995	249.445	255.843	296.373	238.26	259.943	189.501	209.365	230.803
Apigenin	2.577	73.989	90.9	W243C	Train	75.1716	195.751	86.7193	79.7802	205.617	56.9036	93.5985	114.684	63.7745	29.1195	137.095	106.304
Caffeic acid	1.196	47.158	77.76	W243C	Train	633	271.761	358.171	203.387	322.779	355.775	346.279	348.01	420.337	398.876	249.775	327.515
Chrysin	2.871	71.966	70.67	W243C	Train	113.423	205.981	154.779	118.469	226.553	156.987	196.4	179.92	149.704	83.7274	173.562	164.608
Ferulic acid	1.499	51.627	66.76	W243C	Train	397.118	272.546	529.997	247.715	330.668	447.095	439.281	359.314	435.598	438.092	383.131	388.344
Hesperetin	2.519	78.063	96.22	W243C	Train	54.3207	191.363	165.656	89.4989	199.715	60.776	114.415	85.2591	37.2209	17.7649	247.403	120.907
Kaempferol	2.282	76.012	111.13	W243C	Test	71.0555	186.791	28.2729	43.7896	186.58	-43.5459	-11.0874	56.7103	22.8702	13.5304	101.292	58.5203
Luteoline	2.282	76.012	111.13	W243C	Train	18.4602	186.791	28.2729	43.7896	186.58	-43.5459	-11.0874	56.7103	22.8702	13.5304	101.292	58.5203
Salicylic acid	1.09	35.424	57.53	W243C	Train	196.3	313.411	366.086	275.174	379.563	357.726	321.514	284.921	302.711	250.551	188.289	303.995
Sinapic acid	1.507	58.119	75.99	W243C	Train	502.309	254.945	595.816	232.743	308.243	472.63	477.133	346.588	440.668	436.501	480.684	404.595
Syringic acid	1.108	48.408	75.99	W243C	Train	232.957	277.758	529.435	245.348	336.269	424.433	407.133	352.758	418.897	407.724	382.066	378.182
trans-Cinnamic acid	1.784	43.112	37.3	W243C	Test	473.621	313.192	565.771	329.891	386.538	484.403	452.406	335.74	362.949	355.57	322.71	390.917
Vanillic acid	1.099	41.916	66.76	W243C	Train	494.34	295.815	453.886	261.049	358.352	392.37	365.218	330.055	368.953	340.781	285.177	345.166
Water	0	0	0	W243C	Train	68.7964	122.016	274.091	55.6308	461.402	-0.945919	77.8196	11.6732	14.6668	11.2624	460.781	148.84
1-Naphthaleneacetic acid	2.467	55.493	37.3	W243I	Train	778.036	425.988	660.065	411.828	433.026	632.877	658.325	459.357	607.34	648.184	450.387	538.738
1-Naphthol	2.545	45.971	20.23	W243I	Test	205.863	487.554	528.928	462.811	478.629	596.311	610.558	471.667	565.179	598.274	301.372	510.128
4-Coumaric acid	1.49	45.135	57.53	W243I	Test	668.064	463.267	603.003	427.793	455.77	569.107	565.059	471.053	574.587	586.793	404.086	512.052
4-Hydroxybenzoic acid	1.09	35.424	57.53	W243I	Train	507.09	501.786	479.592	455.421	482.578	491.122	475.6	433.613	472.537	452.46	306.133	455.084
6-Hydroxyflavone	3.166	69.943	50.44	W243I	Train	228.176	320.815	311.199	224.48	325.462	330.186	362.294	313.949	307.874	305.786	327.209	312.925
Apigenin	2.577	73.989	90.9	W243I	Train	92.7034	275.958	96.9044	102.304	266.614	95.1067	99.0944	199.734	58.3269	52.9241	254.939	150.19
Caffeic acid	1.196	47.158	77.76	W243I	Train	862.507	425.204	478.835	342.7	415.96	492.427	500.127	467.054	604.524	595.723	367.619	469.017
Chrysin	2.871	71.966	70.67	W243I	Train	172.393	297.027	199.731	161.288	294.706	213.399	232.843	261.988	161.167	151.222	291.406	226.478
Ferulic acid	1.499	51.627	66.76	W243I	Train	687.189	427.624	694.592	398.259	428.908	611.578	609.054	469.061	611.459	627.797	500.975	537.93
Hesperetin	2.519	78.063	96.22	W243I	Train	71.8524	266.878	206.741	110.59	259.336	113.632	113.719	163.207	31.1385	28.366	365.247	165.885
Kaempferol	2.282	76.012	111.13	W243I	Test	86.9935	257.404	4.99676	47.5523	241.11	-23.4725	-37.6767	131.274	18.8819	17.974	219.136	87.718
Luteoline	2.282	76.012	111.13	W243I	Train	23.2416	257.404	4.99676	47.5523	241.11	-23.4725	-37.6767	131.274	18.8819	17.974	219.136	87.718
Salicylic acid	1.09	35.424	57.53	W243I	Train	260.052	501.786	479.592	455.421	482.578	491.122	475.6	433.613	472.537	452.46	306.133	455.084
Sinapic acid	1.507	58.119	75.99	W243I	Train	652.126	393.613	779.236	369.025	401.424	653.603	648.426	446.977	605.176	616.947	598.528	551.295
Syringic acid	1.108	48.408	75.99	W243I	Train	333.367	436.474	691.09	402.384	434.556	590.99	575.896	471.856	603.405	606.319	499.909	531.288
trans-Cinnamic acid	1.784	43.112	37.3	W243I	Test	604.312	505.861	728.443	519.006	498.79	644.837	629.214	466.336	529.591	553.482	440.554	551.611
Vanillic acid	1.099	41.916	66.76	W243I	Train	719.065	470.043	593.611	430.744	459.956	542.285	527.866	463.597	550.388	546.528	403.021	498.804
Water	0	0	0	W243I	Train	79.953	316.7	171.145	215.501	396.308	115.961	98.547	19.354	23.528	12.2971	578.625	194.797
1-Naphthaleneacetic acid	2.467	55.493	37.3	W243L	Train	1406.85	919.163	961.221	870.254	868.844	977.058	1107.84	866.409	1018.69	1008.23	714.013	931.173
1-Naphthol	2.545	45.971	20.23	W243L	Test	731.483	1053.46	863.111	935.216	953.876	959.763	1044.78	889.179	969.139	1014.47	564.998	924.799
4-Coumaric acid	1.49	45.135	57.53	W243L	Test	1241.5	943.845	912.663	902.562	905.325	943.02	997.199	871.509	1013.8	988.873	667.712	914.651
4-Hydroxybenzoic acid	1.09	35.424	57.53	W243L	Train	894.847	921.427	803.089	934.405	945.805	868.723	865.31	864.413	900.353	922.547	569.759	859.583
6-Hydroxyflavone	3.166	69.943	50.44	W243L	Train	420.693	615.702	572.244	569.81	655.776	485.51	545.702	680.304	522.026	522.685	590.834	576.059
Apigenin	2.577	73.989	90.9	W243L	Train	93.9645	464.261	280.948	366.706	536.076	157.475	110.981	300.303	63.4731	77.7801	518.564	287.657
Caffeic acid	1.196	47.158	77.76	W243L	Train	1173.76	850.451	784.491	801.511	826.369	841.497	899.19	842.846	1060.97	965.368	631.245	850.394
Chrysin	2.871	71.966	70.67	W243L	Train	362.918	533.867	426.258	467.129	593.182	322.992	332.569	520.644	243.929	253.868	555.032	424.947
Ferulic acid	1.499	51.627	66.76	W243L	Train	1289.31	879.731	984.984	864.936	856.741	979.297	1060.73	852.482	1056.06	987.766	764.6	928.733
Hesperetin	2.519	78.063	96.22	W243L	Train	106.916	434.985	396.152	367.2	522.413	161.471	115.506	210.264	27.3666	36.8405	628.873	290.107
Kaempferol	2.282	76.012	111.13	W243L	Test	79.0245	406.273	140.731	269.737	484.312	-9.29545	-116.854	101.344	15.7727	20.3993	482.762	179.518
Luteoline	2.282	76.012	111.13	W243L	Train	24.8354	406.273	140.731	269.737	484.312	-9.29545	-116.854	101.344	15.7727	20.3993	482.762	179.518
Salicylic acid	1.09	35.424	57.53	W243L	Train	578.08	921.427	803.089	934.405	945.805	868.723	865.31	864.413	900.353	922.547	569.759	859.583
Sinapic acid	1.507	58.119	75.99	W243L	Train	1006.41	796.32	1050.31	822.923	805.269	1011.75	1113.29	811.834	1050.4	941.808	862.153	926.605
Syringic acid	1.108	48.408	75.99	W243L	Train	430.654	874.638	981.193	874.735	865.073	967.882	1020	852.528	1060.02	980.551	763.535	924.016
trans-Cinnamic acid	1.784	43.112	37.3	W243L	Test	1271.38	1031.21	1030.29	1003.2	990.36	1042.47	1093	883.982	948.479	989.637	704.18	971.68
Vanillic acid	1.099	41.916	66.76	W243L	Train	1173.76	917.958	901.68	908.845	909.601	921.452	947.574	866.995	998.391	967.46	666.647	900.66
Water	0	0	0	W243L	Train	197.561	284.727	232.471	405.42	444.513	343.278	159.852	350.929	46.8798	92.5896	842.251	320.291
1-Naphthaleneacetic acid	2.467	55.493	37.3	W243N	Train	1396.89	915.642	1016.16	952.474	885.05	1024.63	1117.84	865.299	1003.08	1016.54	750.042	954.677
1-Naphthol	2.545	45.971	20.23	W243N	Test	145.763	1013.51	901.39	1013.05	968.782	972.895	1049.63	897.548	932.321	989.664	601.027	933.981
4-Coumaric acid	1.49	45.135	57.53	W243N	Test	990.475	888.281	952.329	978.576	918.582	960.793	996.444	876.559	972.178	981.191	703.741	922.867
4-Hydroxybenzoic acid	1.09	35.424	57.53	W243N	Train	627.886	801.162	814.509	1000.99	954.167	862.375	862.208	878.642	857.361	901.65	605.788	853.885
6-Hydroxyflavone	3.166	69.943	50.44	W243N	Train	725.506	635.276	638.849	654.132	669.853	588.449	616.645	641.927	748.136	724.266	626.863	654.439
Apigenin	2.577	73.989	90.9	W243N	Train	105.918	476.736	349.47	447.995	547.636	278.387	209.111	224.92	252.116	235.179	554.593	357.614
Caffeic acid	1.196	47.158	77.76	W243N	Train	1520.41	809.621	831.311	878.735	839.151	862.046	903.065	839.181	1028.5	980.419	667.274	863.93
Chrysin	2.871	71.966	70.67	W243N	Train	564.134	549.993	494.096	550.131	605.956	434.59	416.683	456.122	526.057	489.198	591.061	511.389
Ferulic acid	1.499	51.627	66.76	W243N	Train	1034.3	854.262	1037.18	944.478	871.381	1018.2	1061.83	849.312	1027.06	1001.23	800.629	946.556
Hesperetin	2.519	78.063	96.22	W243N	Train	92.5718	446.407	467.976	448.735	533.883	304.68	220.127	143.958	133.893	134.254	664.902	349.882
Kaempferol	2.282	76.012	111.13	W243N	Test	55.1176	415.357	209.469	348.947	494.75	121.589	-4.01849	59.7584	68.8811	72.709	518.791	230.623
Luteoline	2.282	76.012	111.13	W243N	Train	38.3827	415.357	209.469	348.947	494.75	121.589	-4.01849	59.7584	68.8811	72.709	518.791	230.623
Salicylic acid	1.09	35.424	57.53	W243N	Train	514.328	801.162	814.509	1000.99	954.167	862.375	862.208	878.642	857.361	901.65	605.788	853.885
Sinapic acid	1.507	58.119	75.99	W243N	Train	1249.47	791.023	1111.37	904.966	820.493	1074.14	1117.43	797.525	1048.49	989.081	898.182	955.27
Syringic acid	1.108	48.408	75.99	W243N	Train	235.414	830.566	1028.85	952.197	878.692	998.915	1018	851.07	1021.95	989.346	799.564	936.915
trans-Cinnamic acid	1.784	43.112	37.3	W243N	Test	966.568	957.479	1061.07	1077.53	1003.91	1057.88	1087.8	894.739	904.204	964.579	740.209	974.941
Vanillic acid	1.099	41.916	66.76	W243N	Train	1299.27	838.735	934.356	982.018	921.278	932.804	944.66	873.973	952.506	958.223	702.676	904.123
Water	0	0	0	W243N	Train	255.336	209.629	153.898	235.002	293.517	336.142	146.498	431.59	68.7527	91.4221	878.28	284.473
1-Naphthaleneacetic acid	2.467	55.493	37.3	W243T	Train	864.101	528.725	667.779	574.588	564.392	774.856	757.762	624.317	716.297	716.879	536.299	646.189
1-Naphthol	2.545	45.971	20.23	W243T	Test	138.923	625.738	542.307	643.351	620.816	707.622	702.151	635.746	601.131	638.409	387.283	610.455
4-Coumaric acid	1.49	45.135	57.53	W243T	Test	803.536	569.049	609.107	605.94	589.995	693.388	653.11	630.643	625.583	635.004	489.998	610.182
4-Hydroxybenzoic acid	1.09	35.424	57.53	W243T	Train	519.841	606.505	482.299	645.088	618.913	593.661	551.562	597.122	454.047	489.313	392.045	543.055
6-Hydroxyflavone	3.166	69.943	50.44	W243T	Train	258.458	375.522	293.008	314.568	425.809	459.129	435.242	473.724	514.812	504.327	413.12	420.926
Apigenin	2.577	73.989	90.9	W243T	Train	100.672	311.311	47.1219	150.497	348.595	210.951	147.325	295.815	146.139	171.003	340.85	216.961
Caffeic acid	1.196	47.158	77.76	W243T	Train	1230.67	508.369	479.181	501.555	538.804	609.975	583.235	622.271	700.83	661.339	453.53	565.909
Chrysin	2.871	71.966	70.67	W243T	Train	467.245	340.879	166.519	230.039	385.451	335.667	293.69	397.418	332.966	339.334	377.317	319.928
Ferulic acid	1.499	51.627	66.76	W243T	Train	782.817	518.671	699.045	565.38	557.415	756.382	703.568	626.913	716.978	694.382	586.886	642.562
Hesperetin	2.519	78.063	96.22	W243T	Train	157.917	299.021	162.974	156.154	339.445	250.401	163.972	240.934	77.1375	103.066	451.158	224.426
Kaempferol	2.282	76.012	111.13	W243T	Test	150.745	286.115	-62.0755	76.295	315.149	86.4041	-2.44629	177.55	40.8745	60.6869	305.047	128.36
Luteoline	2.282	76.012	111.13	W243T	Train	24.8354	286.115	-62.0755	76.295	315.149	86.4041	-2.44629	177.55	40.8745	60.6869	305.047	128.36
Salicylic acid	1.09	35.424	57.53	W243T	Train	307.866	606.505	482.299	645.088	618.913	593.661	551.562	597.122	454.047	489.313	392.045	543.055
Sinapic acid	1.507	58.119	75.99	W243T	Train	895.977	470.171	782.079	523.682	523.268	820.879	748.72	603.184	766.866	713.876	684.439	663.716
Syringic acid	1.108	48.408	75.99	W243T	Train	177.175	524.335	694.452	574.579	563.459	732.092	666.524	627.846	691.211	666.502	585.821	632.682
trans-Cinnamic acid	1.784	43.112	37.3	W243T	Test	739.785	639.029	736.089	715.277	645.145	776.191	722.019	628.807	542.427	590.074	526.465	652.152
Vanillic acid	1.099	41.916	66.76	W243T	Train	720.659	568.524	597.546	612.968	593.625	663.318	611.514	622.812	582.069	591.746	488.933	593.306
Water	0	0	0	W243T	Train	161.237	315.671	75.4367	289.909	354.333	240.48	103.185	47.8945	13.571	12.8815	664.537	211.79
1-Naphthaleneacetic acid	2.467	55.493	37.3	W243V	Train	548.529	401.715	675.842	382.956	421.518	613.385	602.502	421.447	558.471	595.991	429.628	510.346
1-Naphthol	2.545	45.971	20.23	W243V	Test	146.892	457.851	543.793	430.222	466.902	561.921	551.401	429.863	493.678	525.469	280.613	474.171
4-Coumaric acid	1.49	45.135	57.53	W243V	Test	393.931	437.231	617.984	394.577	445.111	538.32	503.909	427.702	500.08	527.991	383.327	477.623
4-Hydroxybenzoic acid	1.09	35.424	57.53	W243V	Train	319.022	474.353	492.579	418.435	473.422	451.363	415.376	384.379	386.121	393.37	285.374	417.477
6-Hydroxyflavone	3.166	69.943	50.44	W243V	Train	210.644	305.042	339.304	212.954	316.569	338.426	359.319	279.753	350.628	358.239	306.449	316.668
Apigenin	2.577	73.989	90.9	W243V	Train	129.361	263.942	136.069	100.614	259.688	115.111	123.613	165.449	91.8163	96.9248	234.179	158.74
Caffeic acid	1.196	47.158	77.76	W243V	Train	1050.57	402.524	497.744	313.723	406.209	463.961	444.498	424.498	540.113	552.993	346.86	439.312
Chrysin	2.871	71.966	70.67	W243V	Train	178.768	283.268	233.233	154.742	286.842	227.36	243.267	227.169	212.336	217.415	270.647	235.628
Ferulic acid	1.499	51.627	66.76	W243V	Train	507.09	404.199	709.606	367.541	418.129	589.57	548.533	428.407	552.463	582.308	480.215	508.097
Hesperetin	2.519	78.063	96.22	W243V	Train	153.136	255.592	241.279	109.311	252.517	143.66	143.063	131.612	51.3712	55.3147	344.487	172.821
Kaempferol	2.282	76.012	111.13	W243V	Test	77.4307	246.897	49.8025	50.5017	235.034	2.88302	1.48144	101.094	29.5841	33.0039	198.377	94.8658
Luteoline	2.282	76.012	111.13	W243V	Train	28.023	246.897	49.8025	50.5017	235.034	2.88302	1.48144	101.094	29.5841	33.0039	198.377	94.8658
Salicylic acid	1.09	35.424	57.53	W243V	Train	191.519	474.353	492.579	418.435	473.422	451.363	415.376	384.379	386.121	393.37	285.374	417.477
Sinapic acid	1.507	58.119	75.99	W243V	Train	765.285	372.743	793.188	341.014	390.838	641.525	589.747	407.857	568.909	594.451	577.768	527.804
Syringic acid	1.108	48.408	75.99	W243V	Train	212.238	412.955	705.756	370.119	424.107	566.176	514.059	429.373	535.441	558.797	479.15	499.593
trans-Cinnamic acid	1.784	43.112	37.3	W243V	Test	728.628	475.816	740.497	481.897	487.22	611.979	562.768	421.485	449.675	484.146	419.794	513.528
Vanillic acid	1.099	41.916	66.76	W243V	Train	771.66	444.367	608.038	396.051	449.867	509.473	466.335	418.064	469.539	488.902	382.262	463.29
Water	0	0	0	W243V	Train	108.641	289.598	180.462	143.81	449.002	95.2378	67.3188	15.1161	16.8678	11.9658	557.866	182.725
1-Naphthaleneacetic acid	2.467	55.493	37.3	L183QW243N	Train	423.617	163.493	148.822	276.233	193.821	374.177	363.873	226.992	298.05	339.255	254.208	263.892
1-Naphthol	2.545	45.971	20.23	L183QW243N	Test	301.692	170.053	77.8578	305.143	213.963	328.739	318.525	227.574	244.14	231.79	105.193	222.298
4-Coumaric acid	1.49	45.135	57.53	L183QW243N	Test	325.997	164.373	123.986	271.624	204.507	291.08	272.245	219.113	235.233	214.846	207.908	220.491
4-Hydroxybenzoic acid	1.09	35.424	57.53	L183QW243N	Train	172.993	161.113	66.7729	284.512	216.709	213.306	202.852	173.235	151.858	99.9796	109.954	168.029
6-Hydroxyflavone	3.166	69.943	50.44	L183QW243N	Train	349.506	150.168	18.5554	184.351	147.145	209.28	255.878	113.087	165.169	231.575	131.03	160.624
Apigenin	2.577	73.989	90.9	L183QW243N	Train	83.7401	143.998	-42.1139	113.369	121.741	42.2687	106.559	37.2938	36.5214	56.0155	58.7597	67.4413
Caffeic acid	1.196	47.158	77.76	L183QW243N	Train	141.515	159.796	73.8289	215.267	187.765	233.21	230.081	213.946	259.305	247.803	171.44	199.244
Chrysin	2.871	71.966	70.67	L183QW243N	Train	188.134	146.875	-14.3611	147.521	133.913	126.018	181.998	72.0232	88.5958	132.052	95.2271	110.986
Ferulic acid	1.499	51.627	66.76	L183QW243N	Train	227.182	161.835	170.088	255.782	192.528	334.781	308.395	223.097	277.41	291.097	304.796	251.981
Hesperetin	2.519	78.063	96.22	L183QW243N	Train	116.014	142.844	2.19383	122.677	118.148	67.5661	131.557	26.2181	22.5916	33.0055	169.068	83.587
Kaempferol	2.282	76.012	111.13	L183QW243N	Test	82.5447	141.495	-64.7414	81.6963	110.609	-41.1598	30.2237	17.6098	15.774	21.0095	22.9571	33.5473
Luteoline	2.282	76.012	111.13	L183QW243N	Train	53.0595	141.495	-64.7414	81.6963	110.609	-41.1598	30.2237	17.6098	15.774	21.0095	22.9571	33.5473
Salicylic acid	1.09	35.424	57.53	L183QW243N	Train	282.965	161.113	66.7729	284.512	216.709	213.306	202.852	173.235	151.858	99.9796	109.954	168.029
Sinapic acid	1.507	58.119	75.99	L183QW243N	Train	165.821	158.539	212.025	241.893	180.245	380.066	344.204	204.93	292.883	340.49	402.349	275.762
Syringic acid	1.108	48.408	75.99	L183QW243N	Train	203.275	161.332	170.04	252.702	195.251	307.885	277.189	219.348	257.291	248.824	303.731	239.359
trans-Cinnamic acid	1.784	43.112	37.3	L183QW243N	Test	139.523	169.509	181.711	333.771	222.466	348.707	314.526	212.848	204.223	174.529	244.375	240.667
Vanillic acid	1.099	41.916	66.76	L183QW243N	Train	147.492	162.497	122.122	268.623	206.598	260.63	240.313	205.985	207.475	170.156	206.843	205.124
Water	0	0	0	L183QW243N	Train	169.008	-293.149	25.1185	193.234	170.856	-69.3048	-1.30455	11.2854	11.4389	11.2226	382.446	44.1843
1-Naphthaleneacetic acid	2.467	55.493	37.3	L241DW243N	Train	1205.64	880.157	897.177	730.391	680.871	849.443	994.044	839.494	918.217	906.639	668.214	836.465
1-Naphthol	2.545	45.971	20.23	L241DW243N	Test	693.63	1020.36	793.611	796.411	742.456	884.929	936.176	855.76	801.359	880.213	519.199	823.048
4-Coumaric acid	1.49	45.135	57.53	L241DW243N	Test	988.483	911.88	844.698	762.266	703.477	812.283	886.724	842.642	847.402	870.65	621.913	810.394
4-Hydroxybenzoic acid	1.09	35.424	57.53	L241DW243N	Train	737.46	903.921	727.76	792.221	725.625	769.817	772.154	828.094	669.477	780.537	523.96	749.357
6-Hydroxyflavone	3.166	69.943	50.44	L241DW243N	Train	661.754	588.565	507.042	434.262	517.685	494.623	526.887	682.66	679.478	584.744	545.036	556.098
Apigenin	2.577	73.989	90.9	L241DW243N	Train	105.918	449.44	219.26	239.281	423.797	224.19	148.663	372.007	197.018	165.699	472.766	291.212
Caffeic acid	1.196	47.158	77.76	L241DW243N	Train	952.622	816.367	715.686	658.962	643.778	729.871	797.258	822.388	931.838	870.108	585.446	757.17
Chrysin	2.871	71.966	70.67	L241DW243N	Train	426.669	513.153	362.266	335.036	468.632	360.68	341.207	556.67	454.488	369.166	509.233	427.053
Ferulic acid	1.499	51.627	66.76	L241DW243N	Train	874.925	843.79	921.023	724.189	669.334	811.992	943.123	830.276	938.15	892.13	718.802	829.281
Hesperetin	2.519	78.063	96.22	L241DW243N	Train	48.7424	422.902	334.724	241.212	413.224	192.416	159.541	285.18	97.6866	92.0732	583.074	282.203
Kaempferol	2.282	76.012	111.13	L241DW243N	Test	35.1951	396.45	82.3293	147.984	383.086	86.1713	-48.8676	167.196	48.344	50.8265	436.963	175.048
Luteoline	2.282	76.012	111.13	L241DW243N	Train	114.885	396.45	82.3293	147.984	383.086	86.1713	-48.8676	167.196	48.344	50.8265	436.963	175.048
Salicylic acid	1.09	35.424	57.53	L241DW243N	Train	621.909	903.921	727.76	792.221	725.625	769.817	772.154	828.094	669.477	780.537	523.96	749.357
Sinapic acid	1.507	58.119	75.99	L241DW243N	Train	813.165	761.015	989.617	681.658	631.644	806.253	991.949	798.915	985.559	876.23	816.355	833.92
Syringic acid	1.108	48.408	75.99	L241DW243N	Train	994.459	840.915	916.33	733.865	673.938	794.47	904.159	829.976	921.204	879.684	717.736	821.228
trans-Cinnamic acid	1.784	43.112	37.3	L241DW243N	Test	715.545	1004.8	963.772	866.098	767.339	892.725	974.907	849.838	750.947	852.021	658.381	858.082
Vanillic acid	1.099	41.916	66.76	L241DW243N	Train	605.971	890.038	832.268	768.085	704.084	785.617	841.302	837.2	810.474	844.754	620.848	793.467
Water	0	0	0	L241DW243N	Train	350.964	315.548	164.327	117.787	72.8331	257.275	313.522	260.627	18.5262	46.4467	796.452	236.334

## Sheet: ANN Prediction New substrates
Molecule	logP	MR	TPSA	Enzyme	Rate - Output (17. MLP 12-3-1)	Rate - Output (22. MLP 12-5-1)	Rate - Output (30. MLP 12-7-1)	Rate - Output (32. MLP 12-3-1)	Rate - Output (38. MLP 12-5-1)	Rate - Output (41. MLP 12-7-1)	Rate - Output (46. MLP 12-3-1)	Rate - Output (53. MLP 12-5-1)	Rate - Output (58. MLP 12-7-1)	Rate - Output (63. MLP 12-7-1)	Rate - Output (Ensemble)
Indole-3-acetic acid	1.313	49.843	53.09	WT	145.187	468.508	410.784	143.962	581.425	357.236	181.055	213.184	267.967	529.374	329.868
Ampicillin	0.318	92.564	112.73	WT	142.221	1640.37	482.15	122.313	3374.57	1020.38	102.321	186.262	275.219	1884.68	923.048
Tetracycline	-0.214	110.218	181.62	WT	133.638	1138.33	322.457	77.3528	3001.98	878.994	11.2472	11.3437	11.2304	1851.95	743.853
Digitoxin	3.247	194.937	182.83	WT	125.969	1253.67	397.305	21.0518	6703.97	-3063.89	11.2224	11.2224	11.2224	2707.11	817.886
Cyanidin-3-glucoside	0.382	108.294	191.6	WT	131.195	475.804	217.03	59.912	1156.12	374.818	11.2224	11.2224	11.2224	1231.7	368.025
3,4-Dihydroxybenzoic acid	0.796	37.447	77.76	WT	133.352	62.2412	267.003	126.947	135.868	138.793	139.962	181.323	174.845	33.2671	139.36
Serotonin	0.893	52.802	62.04	WT	145.298	711.36	464.296	149.488	843.912	426.154	185.551	209.388	277.755	783.383	419.659
Dopamine	0.599	42.968	66.48	WT	136.658	498.699	432.808	147.384	530.036	298.529	144.769	164.265	173.11	542.785	306.904
Hydroquinone	1.098	30.488	40.46	WT	122.654	190.561	411.582	145.472	228.97	193.208	84.1758	108.663	75.5219	139.134	169.994
Arbutin	-1.429	62.61	119.61	WT	139.576	1914.59	689.85	169.559	2769.58	648.71	191.925	183.865	279.519	1819.11	880.629
3-Indoleacetate	-0.022	47.901	55.92	WT	134.459	1509.26	761.28	185.808	1606.41	538.656	122.407	113.178	119.022	1301.25	639.174
trans-Zeatin	0.173	60.905	86.72	WT	145.363	1097.84	506.889	149.908	1419.77	541.23	200.068	228.145	342.595	1190.34	582.215
6-Benzylaminopurine	1.483	65.476	66.49	WT	145.391	615.981	384.948	129.974	892.698	484.832	185.114	261.532	379.896	798.336	427.87
cis-Jasmone	3.022	52.129	17.07	WT	147.191	77.3672	310.161	129.286	272.753	268.699	187.279	261.53	316.356	26.6468	199.727
Indole-3-acetic acid	1.313	49.843	53.09	W243C	305.407	972.82	383.497	388.915	648.834	579.021	359.326	393.572	412.83	647.929	509.215
Ampicillin	0.318	92.564	112.73	W243C	233.012	2423.79	485.201	320.629	2821.16	1535.24	248.837	342.439	312.713	2003.23	1072.63
Tetracycline	-0.214	110.218	181.62	W243C	179.478	1952.86	281.613	201.328	2397.82	1330.31	12.4401	11.3981	11.2273	1970.51	834.898
Digitoxin	3.247	194.937	182.83	W243C	133.441	2114.31	329.841	69.1767	3590.63	-5607.75	11.2224	11.2224	11.2224	2825.67	348.897
Cyanidin-3-glucoside	0.382	108.294	191.6	W243C	164.83	1011.57	143.288	154.931	805.845	582.97	11.2231	11.2224	11.2224	1350.25	424.736
3,4-Dihydroxybenzoic acid	0.796	37.447	77.76	W243C	292.345	275.137	211.385	348.107	305.487	278.271	306.345	343.449	289.29	151.822	280.164
Serotonin	0.893	52.802	62.04	W243C	309.563	1331.43	449.513	405.146	842.609	678.917	365.042	391.726	422.716	901.938	609.86
Dopamine	0.599	42.968	66.48	W243C	320.254	1009.96	406.715	409.633	597.562	500.083	312.786	319.632	295.048	661.34	483.301
Hydroquinone	1.098	30.488	40.46	W243C	343.482	505.273	364.61	426.406	393.53	347.402	218.263	218.632	153.555	257.688	322.884
Arbutin	-1.429	62.61	119.61	W243C	320.328	2603.57	730.139	466.959	2360.17	1006.75	374.243	370.932	412.966	1937.66	1058.37
3-Indoleacetate	-0.022	47.901	55.92	W243C	374.469	2195.23	789.665	534.335	1444.01	834.556	280.855	236.602	225.188	1419.81	833.471
trans-Zeatin	0.173	60.905	86.72	W243C	298.228	1833.18	507.294	403.396	1279.83	848.347	382.702	426.888	481.497	1308.9	777.026
6-Benzylaminopurine	1.483	65.476	66.49	W243C	264.695	1211.01	357.735	340.802	861.817	760.549	363.009	458.983	501.56	916.891	603.705
Indole-3-acetic acid	1.313	49.843	53.09	W243I	489.561	1193.82	593.908	505.937	889.892	786.367	481.03	567.36	612.24	765.773	688.589
Ampicillin	0.318	92.564	112.73	W243I	349.324	2666.98	719.977	428.09	3795.71	1932.42	334.32	456.353	477.861	2121.08	1328.21
Tetracycline	-0.214	110.218	181.62	W243I	241.693	2340.65	388.052	266.553	3280.42	1628.44	27.4677	11.2765	11.2508	2088.35	1028.42
Digitoxin	3.247	194.937	182.83	W243I	144.165	2576.97	293.192	92.5373	5263.65	-9243.12	11.2224	11.2224	11.2224	2943.51	210.457
Cyanidin-3-glucoside	0.382	108.294	191.6	W243I	211.301	1372.81	164.32	202.62	1207.5	656.129	11.5254	11.2224	11.2224	1468.1	531.675
3,4-Dihydroxybenzoic acid	0.796	37.447	77.76	W243I	461.507	368.785	368.422	442.906	429.67	424.391	448.777	529.433	497.061	269.666	424.062
Serotonin	0.893	52.802	62.04	W243I	495.897	1570.08	687.598	529.159	1164.23	911.768	487.024	568.614	625.917	1019.78	806.007
Dopamine	0.599	42.968	66.48	W243I	512.898	1215.66	635.44	527.857	840.98	696.981	456.669	492.545	505.177	779.184	666.339
Hydroquinone	1.098	30.488	40.46	W243I	555.739	624.838	578.215	537.467	541.949	505.692	378.211	360.588	328.79	375.532	478.702
Arbutin	-1.429	62.61	119.61	W243I	506.038	2726.04	1078.9	616.633	3216.31	1326.36	505.363	571.042	638.971	2055.51	1324.12
3-Indoleacetate	-0.022	47.901	55.92	W243I	606.115	2294.25	1138.24	696.433	1986.52	1107	437.69	378.186	428.225	1537.65	1061.03
trans-Zeatin	0.173	60.905	86.72	W243I	472.849	2073.97	770.408	530.787	1765.72	1122.29	496.116	616.172	684.179	1426.74	995.923
6-Benzylaminopurine	1.483	65.476	66.49	W243I	412.455	1481.31	544.093	448.312	1181.98	994.301	454.501	622.608	679.194	1034.73	785.35
cis-Jasmone	3.022	52.129	17.07	W243I	442.621	433.803	397.837	441.428	557.09	587.871	461.633	599.526	637.855	263.046	482.271
Indole-3-acetic acid	1.313	49.843	53.09	W243L	1000.52	1397.61	1090.59	1011.64	1347.08	1346.66	884.087	1005.49	1016.69	1029.4	1112.98
Ampicillin	0.318	92.564	112.73	W243L	628.491	2518.3	1253.65	876.933	4892.09	3128.41	633.138	898.631	708.569	2384.7	1792.29
Tetracycline	-0.214	110.218	181.62	W243L	334.854	2402.77	780.07	546.028	4141.61	2569.68	11.5379	11.23	11.2458	2351.98	1316.1
Digitoxin	3.247	194.937	182.83	W243L	152.536	2853.15	203.849	198.524	4493.26	-19032.8	11.2224	11.2224	11.2224	3207.14	-789.069
Cyanidin-3-glucoside	0.382	108.294	191.6	W243L	272.937	1613.83	391	413.156	1463.73	931.99	11.2224	11.2224	11.2224	1731.72	685.203
3,4-Dihydroxybenzoic acid	0.796	37.447	77.76	W243L	856.228	690.306	839.867	869.311	788.922	791.481	854.949	986.315	933.553	533.292	814.422
Serotonin	0.893	52.802	62.04	W243L	997.357	1669.07	1192.3	1061.39	1694.61	1550.39	885.315	1017.25	1025.62	1283.41	1237.67
Dopamine	0.599	42.968	66.48	W243L	947.199	1399.59	1128.69	1046.37	1307.5	1218.73	874.187	935.88	959.24	1042.81	1086.02
Hydroquinone	1.098	30.488	40.46	W243L	909.579	919.688	1053.29	1044.23	940.528	906.402	847.714	735.009	845.693	639.158	884.129
Arbutin	-1.429	62.61	119.61	W243L	894.464	2460.91	1565.98	1247.32	4274.85	2232.03	876.338	1082.74	1029.45	2319.13	1798.32
3-Indoleacetate	-0.022	47.901	55.92	W243L	1003.98	2089.01	1577.09	1391.9	2746.46	1860.47	876.525	781.64	930.057	1801.28	1505.84
trans-Zeatin	0.173	60.905	86.72	W243L	935.717	2024.6	1286.7	1071.51	2443.85	1891.63	873.818	1090.75	1044.19	1690.37	1435.31
6-Benzylaminopurine	1.483	65.476	66.49	W243L	850.287	1621.45	1037.99	906.178	1669.34	1654.9	841.028	1064.29	1005.02	1298.36	1194.88
cis-Jasmone	3.022	52.129	17.07	W243L	981.423	766.106	849.048	883.994	877.877	985.166	880.785	993.705	1020.16	526.672	876.493
Indole-3-acetic acid	1.313	49.843	53.09	W243N	942.749	1440.96	1168.03	1027.81	1401.29	1330.62	891.105	956.131	1000.33	1065.43	1122.45
Ampicillin	0.318	92.564	112.73	W243N	642.178	2590.26	1341.72	897.768	5292.23	3052.35	581.916	1008.34	896.525	2420.73	1872.4
Tetracycline	-0.214	110.218	181.62	W243N	338.325	2479.06	868.767	559.269	4594.53	2547.97	11.2699	12.3063	12.2728	2388.01	1381.18
Digitoxin	3.247	194.937	182.83	W243N	151.934	2901.89	258.462	203.487	6841.1	-16622.9	11.2224	11.2224	11.2224	3243.17	-298.919
Cyanidin-3-glucoside	0.382	108.294	191.6	W243N	274.424	1701	473.306	422.89	1807.86	1017.11	11.2224	11.2224	11.2224	1767.75	749.802
3,4-Dihydroxybenzoic acid	0.796	37.447	77.76	W243N	756.26	713.699	909.537	878.288	784.673	791.73	862.658	940.585	927.228	569.321	813.398
Serotonin	0.893	52.802	62.04	W243N	935.229	1715.24	1270.17	1079.02	1779.72	1523.81	892.026	962.292	1009.88	1319.44	1248.68
Dopamine	0.599	42.968	66.48	W243N	834.376	1425.77	1199.58	1059.09	1349.55	1200.68	886.556	882.86	938.655	1078.84	1085.6
Hydroquinone	1.098	30.488	40.46	W243N	744.2	901.094	1108.77	1048.26	930.972	898.269	870.571	706.948	812.968	675.187	869.723
Arbutin	-1.429	62.61	119.61	W243N	795.333	2514.57	1643.78	1269.63	4557.9	2167.58	880.256	1002.71	1022.11	2355.16	1820.9
3-Indoleacetate	-0.022	47.901	55.92	W243N	845.669	2107.32	1647.89	1409.26	2898.33	1813.24	895.582	731.143	894.65	1837.31	1508.04
trans-Zeatin	0.173	60.905	86.72	W243N	889.039	2081.58	1366.7	1091.47	2598.28	1849.33	874.414	1031.98	1042.41	1726.4	1455.16
6-Benzylaminopurine	1.483	65.476	66.49	W243N	850.876	1686.02	1122.13	924.675	1788.7	1637.07	832.322	1049.14	1035.39	1334.39	1226.07
cis-Jasmone	3.022	52.129	17.07	W243N	975.973	815.502	930.611	899.938	906.571	1003.33	883.835	974.793	1011.94	562.7	896.519
Indole-3-acetic acid	1.313	49.843	53.09	W243T	608.965	1186.95	803.636	657.288	1089.47	896.831	640.93	610.376	652.899	851.685	799.903
Ampicillin	0.318	92.564	112.73	W243T	402.371	2617.21	943.072	564.789	4631.63	2169.22	480.978	759.546	684.349	2206.99	1546.02
Tetracycline	-0.214	110.218	181.62	W243T	262.668	2373.17	505.094	351.927	4089.51	1839.2	24.1095	11.7165	12.537	2174.26	1164.42
Digitoxin	3.247	194.937	182.83	W243T	147.098	2699.12	249.27	125.01	7630.33	-10170.7	11.2224	11.2224	11.2224	3029.42	374.319
Cyanidin-3-glucoside	0.382	108.294	191.6	W243T	226.216	1426.97	200.792	266.961	1663.58	767.306	11.278	11.2224	11.2226	1554.01	613.956
3,4-Dihydroxybenzoic acid	0.796	37.447	77.76	W243T	543.063	367.719	541.66	568.935	526.418	497.061	607.845	547.352	542.828	355.577	509.846
Serotonin	0.893	52.802	62.04	W243T	612.483	1541.8	914.12	688.626	1428.68	1035.37	645.581	614.368	665.168	1105.69	925.19
Dopamine	0.599	42.968	66.48	W243T	620.244	1198.93	855.128	681.6	1034.65	796.569	617.667	489.293	540.925	865.095	770.01
Hydroquinone	1.098	30.488	40.46	W243T	673.611	618.787	786.782	684.642	653.635	581.364	546.769	300.576	358.218	461.444	566.583
Arbutin	-1.429	62.61	119.61	W243T	584.389	2615.67	1357.09	805.951	3912.15	1493.97	655.971	630.022	676.68	2141.42	1487.33
3-Indoleacetate	-0.022	47.901	55.92	W243T	742.292	2170.1	1408.87	902.459	2422.3	1246.25	601.624	338.441	454.805	1623.56	1191.07
trans-Zeatin	0.173	60.905	86.72	W243T	570.167	2017.71	1011.15	693.525	2166.57	1269.41	650.844	706.075	731.495	1512.65	1132.96
6-Benzylaminopurine	1.483	65.476	66.49	W243T	498.953	1471.36	736.222	586.803	1464.79	1130.02	615.897	776.141	763.363	1120.65	916.419
cis-Jasmone	3.022	52.129	17.07	W243T	561.047	444.167	556.898	574.638	666.248	678.926	628.853	682.577	695.299	348.957	583.761
Indole-3-acetic acid	1.313	49.843	53.09	W243V	461.356	1204.54	553.087	493.102	871.723	708.545	438.217	489.945	545.605	745.014	651.114
Ampicillin	0.318	92.564	112.73	W243V	332.138	2671.64	670.617	414.286	3893.6	1789.73	297.849	483.817	534.263	2100.32	1318.83
Tetracycline	-0.214	110.218	181.62	W243V	232.6	2315.44	364.522	258.477	3409.59	1537.03	19.5202	11.5321	11.5615	2067.59	1022.79
Digitoxin	3.247	194.937	182.83	W243V	142.586	2522.39	308.268	89.9489	6212.38	-7322.15	11.2224	11.2224	11.2224	2922.75	490.984
Cyanidin-3-glucoside	0.382	108.294	191.6	W243V	204.487	1348.26	162.555	197.069	1316.02	664.438	11.2926	11.2224	11.2224	1447.34	537.39
3,4-Dihydroxybenzoic acid	0.796	37.447	77.76	W243V	437.631	386.243	335.214	434.25	391.587	368.185	401.12	444.582	444.141	248.906	389.186
Serotonin	0.893	52.802	62.04	W243V	467.689	1582.16	642.351	515.251	1156.76	823.46	444.253	489.178	559.173	999.023	767.931
Dopamine	0.599	42.968	66.48	W243V	484.859	1226.4	591.522	516.004	818.986	620.24	408.861	405.586	442.297	758.424	627.318
Hydroquinone	1.098	30.488	40.46	W243V	524.689	632.743	535.56	528.948	500.89	441.46	325.496	278.501	275.364	354.773	439.842
Arbutin	-1.429	62.61	119.61	W243V	480.801	2751.99	1019.4	598.971	3271.2	1201.85	461.067	479.374	578.952	2034.75	1287.84
3-Indoleacetate	-0.022	47.901	55.92	W243V	571.838	2327.07	1083.56	679.29	1999.43	998.86	386.734	295.633	362.422	1516.89	1022.17
trans-Zeatin	0.173	60.905	86.72	W243V	447.093	2088.16	720.479	515.804	1781.73	1018.35	455.176	540.578	626.316	1405.98	959.967
6-Benzylaminopurine	1.483	65.476	66.49	W243V	389.975	1488.27	506.485	435.452	1188.75	911.483	417.239	581.269	642.852	1013.98	757.576
cis-Jasmone	3.022	52.129	17.07	W243V	416.416	452.498	370.564	429.925	529.339	539.005	423.501	545.514	573.372	242.286	452.242
Indole-3-acetic acid	1.313	49.843	53.09	L183QW243N	168.868	437.329	378.627	224.368	539.77	413.307	230.617	233.04	227.99	569.594	342.351
Ampicillin	0.318	92.564	112.73	L183QW243N	154.54	1631.14	458.946	186.455	2886.37	1185.27	115.852	232.553	377.985	1924.9	915.4
Tetracycline	-0.214	110.218	181.62	L183QW243N	139.639	1130.83	285.354	117.3	2542.85	1062.55	11.2376	11.2629	11.3275	1892.17	720.453
Digitoxin	3.247	194.937	182.83	L183QW243N	126.918	1251.21	361.691	36.491	5438.1	-2436.93	11.2224	11.2224	11.2224	2747.33	755.848
Cyanidin-3-glucoside	0.382	108.294	191.6	L183QW243N	135.56	464.487	170.875	90.4934	958.698	520.769	11.2224	11.2224	11.2224	1271.92	364.647
3,4-Dihydroxybenzoic acid	0.796	37.447	77.76	L183QW243N	157.649	21.4383	223.536	200.149	165.978	167.843	187.101	183.538	131.36	73.487	151.208
Serotonin	0.893	52.802	62.04	L183QW243N	169.669	684.773	436.219	233.35	750.946	489.511	235.611	231.663	234.569	823.603	428.991
Dopamine	0.599	42.968	66.48	L183QW243N	165.048	466.381	400.299	234.058	484.343	342.809	195.154	166.752	127.034	583.005	316.488
Hydroquinone	1.098	30.488	40.46	L183QW243N	158.817	145.973	372.118	239.515	246.996	221.634	125.669	94.6749	48.3511	179.353	183.31
Arbutin	-1.429	62.61	119.61	L183QW243N	167.22	1903.24	678.835	267.021	2355.06	735.977	243.131	212.225	219.564	1859.33	864.161
3-Indoleacetate	-0.022	47.901	55.92	L183QW243N	173.429	1487.68	749.257	301.168	1380.26	605.432	172.962	110.148	79.2369	1341.47	640.105
trans-Zeatin	0.173	60.905	86.72	L183QW243N	167.738	1078.76	483.164	232.769	1224.52	620.637	246.773	266.572	304.568	1230.56	585.606
6-Benzylaminopurine	1.483	65.476	66.49	L183QW243N	162.118	592.037	352.734	198.574	797.197	569.138	221.129	311.35	397.41	838.556	444.024
cis-Jasmone	3.022	52.129	17.07	L183QW243N	165.815	37.6794	271.328	197.853	321.001	325.771	230.5	292.343	315.463	66.8667	222.462
Indole-3-acetic acid	1.313	49.843	53.09	L241DW243N	969.985	1345.68	957.747	787.247	1026.51	1196.65	853.365	827.124	891.275	983.6	983.918
Ampicillin	0.318	92.564	112.73	L241DW243N	606.176	2517.33	1121.86	692.589	3098.24	2787.05	653.568	988.29	754.888	2338.9	1555.89
Tetracycline	-0.214	110.218	181.62	L241DW243N	334.497	2387.37	643.836	432.201	2502.84	2322.22	13.4885	11.7083	11.8037	2306.18	1096.61
Digitoxin	3.247	194.937	182.83	L241DW243N	154.575	2831.13	163.762	155.475	988.192	-15277.9	11.2224	11.2224	11.2224	3161.34	-778.981
Cyanidin-3-glucoside	0.382	108.294	191.6	L241DW243N	274.804	1569.56	271.712	327.103	756.817	903.893	11.2226	11.2224	11.2224	1685.92	582.348
3,4-Dihydroxybenzoic acid	0.796	37.447	77.76	L241DW243N	831.533	615.302	695.799	669.695	704.278	702.222	825.138	783.856	809.834	487.493	712.515
Serotonin	0.893	52.802	62.04	L241DW243N	967.718	1629.59	1064.74	826.515	1208.19	1375.61	855.255	834.842	901.535	1237.61	1090.16
Dopamine	0.599	42.968	66.48	L241DW243N	928.188	1345.89	997.421	807.402	978.213	1082.68	839.92	709.307	821.151	997.011	950.718
Hydroquinone	1.098	30.488	40.46	L241DW243N	909.888	842.968	911.481	791.427	813.097	817.073	803.012	475.985	681.13	593.359	763.942
Arbutin	-1.429	62.61	119.61	L241DW243N	870.948	2461.25	1466.37	971.894	2716.66	1973.24	851.394	879.863	913.725	2273.33	1537.87
3-Indoleacetate	-0.022	47.901	55.92	L241DW243N	1003.64	2071.56	1477.07	1071.43	1818.14	1657.9	836.51	519.789	769.543	1755.48	1298.11
trans-Zeatin	0.173	60.905	86.72	L241DW243N	903.274	2003.42	1164.01	837.542	1622.91	1674.56	849.553	936.482	937.303	1644.57	1257.36
6-Benzylaminopurine	1.483	65.476	66.49	L241DW243N	813.636	1580.94	901.693	711.935	1182.92	1474.03	821.316	987.395	924.902	1252.56	1065.13
cis-Jasmone	3.022	52.129	17.07	L241DW243N	941.866	697.138	709.091	691.933	840.639	889.111	849.803	876.642	902.43	480.873	787.953
